# Supplementary material for: Comprehensive Characterization of 76 Pharmaceuticals and Metabolites in Wastewater by LC-MS/MS
Source: MDPI journal article supplement (doi:10.3390/chemosensors9100273), 2021-09-24
Supplement: s1 [file s1]

# Comprehensive Characterization of 76 Pharmaceuticals and Metabolites in Wastewater by LC-MS/MS

Cristian Gómez-Canela <sup>1,\*</sup>, Sílvia Edo <sup>1</sup>, Natalia Rodríguez <sup>1</sup>, Gemma Gotor <sup>1</sup> and Sílvia Lacorte <sup>2</sup>

<sup>1</sup> Department of Analytical Chemistry and Applied (Chromatography Section), School of Engineering, Institut Químic de Sarrià-Universitat Ramon Llull, Via Augusta 390, 08017 Barcelona, Spain; silvia.edo2@gmail.com (S.E.); nataliarodriguezm@iqs.url.edu (N.R.); gemma.gotor@iqs.url.edu (G.G.)

<sup>2</sup> Institute for Environmental Assessment and Water Research (IDAEA-CSIC), Jordi Girona, 18, 08034 Barcelona, Spain; slbqam@cid.csic.es

\* Correspondence: cristian.gomez@iqs.url.edu; Tel.: +34-932672343

**Citation:** Gómez-Canela, C.; Edo, S.; Rodríguez, N.; Gotor, G.; Lacorte, S. Comprehensive Characterization of 76 Pharmaceuticals and Metabolites in Wastewater by LC-MS/MS. *Chemosensors* **2021**, *9*, x. <https://doi.org/10.3390/xxxxx>

Academic Editor: Fabio Gosetti, Cláudia Maria Rosa Ribeiro and Maria Elizabeth Tiritan

Received: 31 July 2021

Accepted: 22 September 2021

Published: 24 September 2021

**Publisher's Note:** MDPI stays neutral with regard to jurisdictional claims in published maps and institutional affiliations.

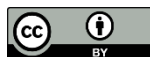

**Copyright:** © 2021 by the authors. Submitted for possible open access publication under the terms and conditions of the Creative Commons Attribution (CC BY) license (<https://creativecommons.org/licenses/by/4.0/>).

**Table S1.** Anatomical Therapeutic Chemical classification system (ATC) of target pharmaceuticals.

|                                    |                                       |                                                                             |                                                  | ATC CODE | NAME                 |
|------------------------------------|---------------------------------------|-----------------------------------------------------------------------------|--------------------------------------------------|----------|----------------------|
| A. Alimentary tract and metabolism | A01. Stomatological preparations      | A01A. Stomatological preparations                                           | A01AD. Other agents for local oral treatment     | A01AD05  | Acetylsalicylic acid |
|                                    | A02. Drugs for acid related disorders | A02B. Drugs for peptic ulcer and gastro-oesophageal reflux disease (gord)   | A02BA. H2-receptor antagonists                   | A02BA02  | Ranitidine           |
|                                    |                                       |                                                                             |                                                  | A02BC01  | Omeprazole           |
|                                    |                                       |                                                                             | A02BC. Proton pump inhibitor                     | A02BC02  | Pantoprazole         |
|                                    |                                       |                                                                             |                                                  | A02BC05  | Esomeprazole         |
|                                    | A10. Drugs used in diabetes           | A10B. Blood glucose lowering drugs, excl. insulins                          | A10BH. Dipeptidyl peptidase 4 (DPP-4) inhibitors | A10BH02  | Vildagliptin         |
| C. Cardiovascular system           | C01. Cardiac therapy                  | C01B. Antiarrhythmics, class I and III                                      | C01BD. Antiarrhythmics, class III                | C01BD01  | Amiodarone           |
|                                    | C03. Diuretics                        | C03A. Low-ceiling diuretics, thiazides                                      | C03AA. Thiazides, plain                          | C03AA03  | Hydrochlorothiazide  |
|                                    |                                       | C03C. High-ceiling diuretics                                                | C03CA. Sulfonamides, plain                       | C03CA01  | Furosemide           |
|                                    | C04. Peripheral vasodilators          | C04A. Peripheral vasodilators                                               | C04AD. Purine derivatives                        | C04AD03  | Pentoxifylline       |
|                                    | C05. Vasoprotectives                  | C05A. Agents for treatment of hemorrhoids and anal fissures for topical use | C05AD. Local anesthetics                         | C05AD01  | Lidocaine            |
|                                    | C07. Beta blocking agents             | C07A. Beta blocking agents                                                  | C07AA. Beta blocking agents, non-selective       | C07AA05  | Propranolol          |
|                                    |                                       |                                                                             | C07AB. Beta blocking agents, selective           | C07AB03  | Atenolol             |
|                                    | C08. Calcium channel blockers         | C08D. Selective calcium channel blockers with direct cardiac effects        | C08DA. Phenylalkylamine derivates                | C08DA01  | Verapamil            |
|                                    |                                       | C09A. Ace inhibitors, plain                                                 | C09AA. ACE inhibitors plain                      | C09AA02  | Enalapril            |

|                                                                    |                                                        |                                                      |                                                       |         |                  |
|--------------------------------------------------------------------|--------------------------------------------------------|------------------------------------------------------|-------------------------------------------------------|---------|------------------|
|                                                                    | C09. Agents acting on the renin-angiotensin system     | C09C. Angiotensin II receptor blockers (ARBs), plain | C09CA. Angiotensin II receptor blockers (ARBs), plain | C09CA01 | Losartan         |
|                                                                    |                                                        |                                                      |                                                       | C09CA03 | Valsartan        |
|                                                                    | C10. Lipid modifying agents                            | C10A. Lipid modifying agents, plain                  | C10AA. HMG CoA reductase inhibitors                   | C10AA01 | Simvastatin      |
|                                                                    |                                                        |                                                      | C10AX. Other lipid modifying agents                   | C10AA07 | Rosuvastatin     |
|                                                                    |                                                        |                                                      |                                                       | C10AX09 | Ezetimibe        |
| G. Genito urinary system and sex hormones                          | G03. Sex hormones and modulators of the genital system | G03C. Estrogens                                      | G03CA. Natural and semisynthetic estrogens, plain     | G03CA07 | Estrone          |
|                                                                    |                                                        | G03H. Antiandrogens                                  | G03HA. Antiandrogens, plain                           | G03HA01 | Cyproterone      |
|                                                                    | G04. Urologicals                                       | G04C. Drugs used in benign prostatic hypertrophy     | G04CB. Testosterone-5-alpha reductase inhibitors      | G04CB02 | Dutasteride      |
| H. Systemic hormonal preparations, excl. sex hormones and insulins | H02. Corticosteroids for systemic use                  | H02A. Corticosteroids for systemic use, plain        | H02AB. Glucocorticoids                                | H02AB07 | Prednisone       |
|                                                                    |                                                        | J01C. Beta-lactam antibacterials, penicillins        | J01CA. Penicillin with extended spectrum              | J01CA04 | Amoxicillin      |
|                                                                    |                                                        | J01E. Sulfonamides and trimethoprim                  | J01EB. Short-acting sulfonamides                      | J01EB04 | Sulfapyridine    |
|                                                                    |                                                        |                                                      | J01EC. Intermediate-acting sulfonamides               | J01EC01 | Sulfamethoxazole |
| J. Anti-infectives for systemic use                                | J01. Antibacterials for systemic use                   | J01F. Macrolides, lincosamides and streptogramins    | J01FA. Macrolides                                     | J01EC02 | Sulfadiazine     |
|                                                                    |                                                        |                                                      |                                                       | J01FA01 | Erythromycin     |
|                                                                    |                                                        |                                                      |                                                       | J01FA09 | Clarithromycin   |
|                                                                    |                                                        | J01M. Quinolone antibacterials                       | J01MA. Fluoroquinolones                               | J01MA02 | Ciprofloxacin    |
|                                                                    |                                                        |                                                      |                                                       | J01MA06 | Norfloxacin      |
|                                                                    |                                                        |                                                      |                                                       | J01MA12 | Levofloxacin     |
| L. Antineoplastic and immunomodulating agents                      | L01. Antineoplastic agents                             | L01A. Alkylating agents                              | L01AA. Nitrogen mustard analogues                     | L01AA01 | Cyclophosphamide |
|                                                                    |                                                        |                                                      |                                                       | L01AA06 | Ifosfamide       |
|                                                                    | L02. Endocrine therapy                                 | L02A. Hormones and related agents                    | L02AB. Progestogens                                   | L02AB01 | Megestrol        |

|                            |                                                  |                                                                 |                                                       |         |                   |
|----------------------------|--------------------------------------------------|-----------------------------------------------------------------|-------------------------------------------------------|---------|-------------------|
|                            |                                                  | L02B. Hormone antagonists and related agents                    | L02BB. Anti-androgens                                 | L02BB03 | Bicalutamide      |
|                            | L04. Immunosuppressants                          | L04A. Immunosuppressants                                        | L04AA. Selective immunosuppressants                   | L04AA06 | Mycophenolic acid |
| M. Musculo-skeletal system | M01. Antiinflammatory and antirheumatic products | M01A. Antiinflammatory and antirheumatic products, non-steroids | M01AB. Acetic acid derivatives and related substances | M01AB05 | Diclofenac        |
|                            |                                                  |                                                                 | M01AE. Propionic acid derivatives                     | M01AE01 | Ibuprofen         |
|                            | N02. Analgesics                                  | N02A. Opioids                                                   | N02AX. Other opioids                                  | N02AX02 | Tramadol          |
|                            |                                                  | N02B. Other analgesics and antipyretics                         |                                                       | N02BE01 | Paracetamol       |
|                            | N03. Antiepileptics                              | N03A. Antiepileptics                                            | N03AF. Carboxamide derivatives                        | N03AF01 | Carbamazepine     |
|                            |                                                  |                                                                 | N03AX. Other antiepileptics                           | N03AX11 | Topiramate        |
|                            |                                                  |                                                                 |                                                       | N03AX12 | Gabapentin        |
|                            |                                                  |                                                                 |                                                       | N03AX14 | Levetiracetam     |
|                            |                                                  |                                                                 |                                                       | N03AX16 | Pregabalin        |
| N. Nervous system          | N04. Anti-parkinson drugs                        | N04B. Dopaminergic agents                                       | N04BA. Dopa and dopa derivatives                      | N04BA01 | Levodopa          |
|                            |                                                  |                                                                 | N04BD. Monoamine oxidase B inhibitors                 | N04BD02 | Rasagiline        |
|                            | N05. Psycholeptics                               | N05B. Anxiolytics                                               | N05BA. Benzodiazepine derivatives                     | N05BA01 | Diazepam          |
|                            |                                                  | N05C. Hypnotics and sedatives                                   | N05CM. Other hypnotics and sedatives                  | N05CM02 | Clomethiazole     |
|                            |                                                  |                                                                 |                                                       | N05CM05 | Scopolamine       |
|                            | N06. Psychoanaleptics                            | N06A. Antidepressants                                           | N06AB. Selective serotonin reuptake inhibitors        | N06AB03 | Fluoxetine        |
|                            |                                                  |                                                                 |                                                       | N06AB04 | Citalopram        |
|                            |                                                  |                                                                 | N06AX. Other antidepressants                          | N06AB10 | Escitalopram      |
|                            |                                                  |                                                                 |                                                       | N06AX05 | Trazodone         |
|                            |                                                  |                                                                 |                                                       | N06AX16 | Venlafaxine       |

|                       |                                            |                                                                |                                        |         |                        |
|-----------------------|--------------------------------------------|----------------------------------------------------------------|----------------------------------------|---------|------------------------|
| R. Respiratory system |                                            | N06B. Psychostimulants, agents used for adhd and nootropics    | N06BC. Xanthine derivatives            | N06BC01 | Caffeine               |
|                       |                                            | N06D. Anti-dementia drugs                                      | N06DA. Anticholinesterases             | N06DA02 | Donepezil              |
|                       |                                            |                                                                | N06DX. Other anti-dementia drugs       | N06DX01 | Memantine              |
|                       | R02. Throat preparations                   | R02A. Throat preparations                                      | R02AA. Antiseptics                     | R02AA03 | Dichlorobenzyl alcohol |
|                       |                                            |                                                                |                                        | R02AA20 | Amylmetacresol         |
|                       | R03. Drugs for obstructive airway diseases | R03B. Other drugs for obstructive airway diseases, inhalants   | R03BA. Glucocorticoids                 | R03BA02 | Budesonide             |
|                       |                                            |                                                                |                                        | R03BA05 | Fluticasone            |
|                       |                                            |                                                                | R03BB. Anticholinergics                | R03BB04 | Tiotropium bromide     |
|                       | R05. Cough and cold preparations           | R05C. Expectorants, excl. combinations with cough suppressants | R05CB. Mucolytics                      | R05CB01 | Acetylcysteine         |
|                       |                                            |                                                                |                                        |         |                        |
|                       |                                            | R05D. Cough suppressants, excl. combinations with expectorants | R05DA. Opium alkaloids and derivatives | R05DA09 | Dextromethorphan       |
|                       |                                            |                                                                | R05DB. Other cough suppressants        | R05DB21 | Cloperastine           |
|                       | R06. Antihistamines for systemic use       | R06A. Antihistamines for systemic use                          | R06AB. Substituted alkylamines         | R06AB02 | Dexchlorpheniramine    |

**Table S2.** Physicochemical properties of the 76 pharmaceuticals, metabolites (\*) and transformation product (\*\*) studied. Mw: molecular weight. Values have been reported from EPI Suite [77].

| Pharmaceutical       | Molecular Formula                                                              | CAS number  | Mw    | Water solubility (mg L <sup>-1</sup> ) | pKa   | logP  | Henry's law constant (atm m <sup>3</sup> mol <sup>-1</sup> ) | Half-life   | Excretion (%) |
|----------------------|--------------------------------------------------------------------------------|-------------|-------|----------------------------------------|-------|-------|--------------------------------------------------------------|-------------|---------------|
| Acetylsalicylic acid | C <sub>9</sub> H <sub>8</sub> O <sub>4</sub>                                   | 50-78-2     | 180.1 | 5295                                   | 3.5   | 1.19  | 1.30 x 10 <sup>-9</sup>                                      | 20 min      | 90            |
| Salicylic acid *     | C <sub>7</sub> H <sub>6</sub> O <sub>3</sub>                                   | 69-72-7     | 138.1 | 3808                                   | n. r. | 2.26  | 1.42 x 10 <sup>-8</sup>                                      | 2 – 12 h    | 10            |
| Ranitidine           | C <sub>13</sub> H <sub>22</sub> N <sub>4</sub> O <sub>3</sub> S                | 66357-35-5  | 314.4 | 24660                                  | 2.7   | 1.93  | 3.42 x 10 <sup>-15</sup>                                     | 2 – 3 h     | 50            |
| Omeprazole           | C <sub>17</sub> H <sub>19</sub> N <sub>3</sub> O <sub>3</sub> S                | 73590-58-6  | 345.4 | 82.28                                  | 4.8   | 2.23  | 3.04 x 10 <sup>-19</sup>                                     | 1 – 1.2 h   | 100           |
| Pantoprazole         | C <sub>16</sub> H <sub>15</sub> F <sub>2</sub> N <sub>3</sub> O <sub>4</sub> S | 102625-70-7 | 383.4 | 48.84                                  | 3.92  | 2.22  | 5.84 x 10 <sup>-20</sup>                                     | 1 – 2 h     | 20            |
| Esomeprazole         | C <sub>17</sub> H <sub>19</sub> N <sub>3</sub> O <sub>3</sub> S                | 119141-88-7 | 345.4 | 82.28                                  | 4.78  | 3.40  | 3.04 x 10 <sup>-19</sup>                                     | 1 – 1.5 h   | 80            |
| Vildagliptin         | C <sub>17</sub> H <sub>25</sub> N <sub>3</sub> O <sub>2</sub>                  | 274901-16-5 | 303.4 | 1336                                   | 15.05 | 0.79  | 3.14 x 10 <sup>-16</sup>                                     | 2 – 3 h     | 27            |
| Amiodarone           | C <sub>25</sub> H <sub>29</sub> I <sub>2</sub> NO <sub>3</sub>                 | 1951-25-3   | 645.3 | 0.0002825                              | 6.56  | 7.57  | 1.80 x 10 <sup>-12</sup>                                     | 58 d        | < 1           |
| Hydrochlorothiazide  | C <sub>7</sub> H <sub>8</sub> ClN <sub>3</sub> O <sub>4</sub> S <sub>2</sub>   | 58-93-5     | 297.7 | 1292                                   | 7.9   | -0.07 | 4.39 x 10 <sup>-12</sup>                                     | 6 – 15 h    | > 95          |
| Furosemide           | C <sub>12</sub> H <sub>11</sub> ClN <sub>2</sub> O <sub>5</sub> S              | 54-31-9     | 330.7 | 149.3                                  | 3.8   | 2.03  | 3.94 x 10 <sup>-16</sup>                                     | 2 h         | 99            |
| Pentoxifylline       | C <sub>13</sub> H <sub>18</sub> N <sub>4</sub> O <sub>3</sub>                  | 6493-05-6   | 278.3 | 453.7                                  | 19.64 | 0.29  | 5.63 x 10 <sup>-14</sup>                                     | 0.4 – 0.8 h | 99            |
| Lidocaine            | C <sub>14</sub> H <sub>22</sub> N <sub>2</sub> O                               | 137-58-6    | 234.3 | 237.7                                  | 7.86  | 2.44  | 1.31 x 10 <sup>-10</sup>                                     | 1.5 – 2 h   | 50            |
| Propranolol          | C <sub>16</sub> H <sub>21</sub> NO <sub>2</sub>                                | 525-66-6    | 259.3 | 228                                    | 9.42  | 3.48  | 7.98 x 10 <sup>-13</sup>                                     | 4 – 5 h     | < 1           |
| Atenolol             | C <sub>14</sub> H <sub>22</sub> N <sub>2</sub> O <sub>3</sub>                  | 29122-68-7  | 266.3 | 685.2                                  | 9.6   | 0.16  | 1.37 x 10 <sup>-18</sup>                                     | 6 – 7 h     | 50            |
| Verapamil            | C <sub>27</sub> H <sub>38</sub> N <sub>2</sub> O <sub>4</sub>                  | 52-53-9     | 454.6 | 4.471                                  | 8.92  | 2.15  | 8.79 x 10 <sup>-15</sup>                                     | 3 – 7 h     | 11            |
| Enalapril            | C <sub>20</sub> H <sub>28</sub> N <sub>2</sub> O <sub>5</sub>                  | 75847-73-3  | 376.4 | 182.5                                  | 3.0   | 0.07  | 3.34 x 10 <sup>-16</sup>                                     | 11 h        | 15            |
| Enalaprilat *        | C <sub>18</sub> H <sub>24</sub> N <sub>2</sub> O <sub>5</sub>                  | 76420-72-9  | 348.4 | 11.32                                  | n. r. | -0.74 | 7.85 x 10 <sup>-19</sup>                                     | 11 h        | 85            |
| Losartan             | C <sub>22</sub> H <sub>23</sub> ClN <sub>6</sub> O                             | 114798-26-4 | 422.9 | 0.8223                                 | 5.5   | 4.01  | 4.35 x 10 <sup>-16</sup>                                     | 1.5 – 2 h   | 80            |
| Valsartan            | C <sub>24</sub> H <sub>29</sub> N <sub>5</sub> O <sub>3</sub>                  | 137862-53-4 | 435.5 | 1.406                                  | 3.73  | 3.65  | 3.08 x 10 <sup>-18</sup>                                     | 6 h         | 70            |
| Simvastatin          | C <sub>25</sub> H <sub>38</sub> O <sub>5</sub>                                 | 79902-63-9  | 418.6 | 0.7653                                 | 14.91 | 4.68  | 2.81 x 10 <sup>-10</sup>                                     | 2 h         | 73            |
| Rosuvastatin         | C <sub>22</sub> H <sub>28</sub> FN <sub>3</sub> O <sub>6</sub> S               | 287714-41-4 | 481.5 | 17.96                                  | 4.0   | 0.13  | 1.50 x 10 <sup>-16</sup>                                     | 19 h        | 90            |
| Ezetimibe            | C <sub>24</sub> H <sub>21</sub> F <sub>2</sub> NO <sub>3</sub>                 | 163222-33-1 | 409.4 | 4.41                                   | 9.73  | 3.94  | 4.41 x 10 <sup>-18</sup>                                     | 19 – 30 h   | 89            |
| Estrone              | C <sub>18</sub> H <sub>22</sub> O <sub>2</sub>                                 | 53-16-7     | 270.4 | 146.8                                  | 10.25 | 3.13  | 3.80 x 10 <sup>-10</sup>                                     | 19 h        | 7             |
| Cyproterone          | C <sub>22</sub> H <sub>27</sub> ClO <sub>3</sub>                               | 2098-66-0   | 374.9 | 12.13                                  | 17.83 | 3.59  | 3.05 x 10 <sup>-9</sup>                                      | 38 h        | 93            |
| Dutasteride          | C <sub>27</sub> H <sub>30</sub> F <sub>6</sub> N <sub>2</sub> O <sub>2</sub>   | 164656-23-9 | 528.5 | 0.02553                                | 13.32 | 6.8   | 3.06 x 10 <sup>-10</sup>                                     | 4 – 5 w     | 5             |

|                                              |                                                                                |             |       |        |       |       |                          |           |       |
|----------------------------------------------|--------------------------------------------------------------------------------|-------------|-------|--------|-------|-------|--------------------------|-----------|-------|
| Prednisone                                   | C <sub>21</sub> H <sub>26</sub> O <sub>5</sub>                                 | 53-03-2     | 358.4 | 312    | 13.9  | 1.46  | 2.83 x 10 <sup>-10</sup> | 1 – 4 h   | 50    |
| Amoxicillin                                  | C <sub>16</sub> H <sub>19</sub> N <sub>3</sub> O <sub>5</sub> S                | 26787-78-0  | 365.4 | 3433   | 2.44  | 0.87  | 2.49 x 10 <sup>-21</sup> | 61.3 min  | 75    |
| Sulfapyridine                                | C <sub>11</sub> H <sub>11</sub> N <sub>3</sub> O <sub>2</sub> S                | 144-83-2    | 249.3 | 11990  | 8.43  | 0.35  | 1.08 x 10 <sup>-13</sup> | 6 – 14 h  | n. r. |
| Sulfadiazine                                 | C <sub>10</sub> H <sub>10</sub> N <sub>4</sub> O <sub>2</sub> S                | 68-35-9     | 250.3 | 28140  | 6.36  | -0.09 | 1.58 x 10 <sup>-10</sup> | 7 – 17 h  | n. r. |
| Sulfamethoxazole                             | C <sub>10</sub> H <sub>11</sub> N <sub>3</sub> O <sub>3</sub> S                | 723-46-6    | 253.3 | 3942   | 5.81  | 0.89  | 9.56 x 10 <sup>-13</sup> | 10 h      | 20    |
| N <sup>4</sup> -acetyl<br>sulfamethoxazole * | C <sub>12</sub> H <sub>13</sub> N <sub>3</sub> O <sub>4</sub> S                | 21312-10-7  | 295.3 | 1216   | n. r. | 1.2   | 3.1 x 10 <sup>-15</sup>  | n. r.     | 70    |
| Erythromycin                                 | C <sub>37</sub> H <sub>67</sub> NO <sub>13</sub>                               | 114-07-8    | 733.9 | 0.5168 | 8.88  | 3.06  | 5.42 x 10 <sup>-29</sup> | 1.5 – 2 h | 15    |
| Clarithromycin                               | C <sub>38</sub> H <sub>69</sub> NO <sub>13</sub>                               | 81103-11-9  | 748.0 | 0.342  | 8.99  | 3.16  | 1.73 x 10 <sup>-29</sup> | 3 – 4 h   | 40    |
| Ciprofloxacin                                | C <sub>17</sub> H <sub>18</sub> FN <sub>3</sub> O <sub>3</sub>                 | 85721-33-1  | 331.3 | 11480  | 6.09  | 0.28  | 5.09 x 10 <sup>-19</sup> | 4 – 6 h   | 70    |
| Norfloxacin                                  | C <sub>16</sub> H <sub>18</sub> FN <sub>3</sub> O <sub>3</sub>                 | 70458-96-7  | 319.3 | 177900 | 6.34  | 0.46  | 8.70 x 10 <sup>-19</sup> | 3 – 4 h   | 32    |
| Levofloxacin                                 | C <sub>18</sub> H <sub>20</sub> FN <sub>3</sub> O <sub>4</sub>                 | 100986-85-4 | 361.4 | 28300  | 6.24  | -0.39 | 4.98 x 10 <sup>-20</sup> | 6 – 8 h   | 87    |
| Cyclophosphamide                             | C <sub>7</sub> H <sub>15</sub> Cl <sub>2</sub> N <sub>2</sub> O <sub>2</sub> P | 50-18-0     | 261.1 | 5943   | 12.78 | 0.63  | 1.36 x 10 <sup>-11</sup> | 3 – 12 h  | 91    |
| Ifosfamide                                   | C <sub>7</sub> H <sub>15</sub> Cl <sub>2</sub> N <sub>2</sub> O <sub>2</sub> P | 3778-73-2   | 261.1 | 3781   | 13.24 | 0.86  | 1.36 x 10 <sup>-11</sup> | 72 h      | 80    |
| Megestrol                                    | C <sub>22</sub> H <sub>30</sub> O <sub>3</sub>                                 | 3562-63-8   | 342.5 | 27.02  | 17.83 | 3.41  | 1.14 x 10 <sup>-8</sup>  | 34 h      | 86    |
| Bicalutamide                                 | C <sub>18</sub> H <sub>14</sub> F <sub>4</sub> N <sub>2</sub> O <sub>4</sub> S | 90357-06-5  | 430.4 | 11.75  | 12.0  | 2.30  | 2.82 x 10 <sup>-15</sup> | 6 d       | 77    |
| Mycophenolic acid                            | C <sub>17</sub> H <sub>20</sub> O <sub>6</sub>                                 | 24280-93-1  | 320.3 | 22.07  | 4.71  | 2.8   | 3.82 x 10 <sup>-12</sup> | 8 – 16 h  | 99    |
| Diclofenac                                   | C <sub>14</sub> H <sub>11</sub> Cl <sub>2</sub> NO <sub>2</sub>                | 15307-86-5  | 296.1 | 4.518  | 4.15  | 4.51  | 4.73 x 10 <sup>-12</sup> | 2 h       | 100   |
| N-(2,6-dichlorophenyl)-2-<br>indolinone *    | C <sub>14</sub> H <sub>9</sub> Cl <sub>2</sub> NO                              | 15362-40-0  | 278.1 | 36.46  | n. r. | 3.1   | 6.39 x 10 <sup>-9</sup>  | n. r.     | n. r. |
| Ibuprofen                                    | C <sub>13</sub> H <sub>18</sub> O <sub>2</sub>                                 | 15687-27-1  | 206.3 | 41.05  | 5.3   | 3.97  | 1.52 x 10 <sup>-7</sup>  | 2 – 4 h   | 15    |
| 1-hydroxy ibuprofen *                        | C <sub>13</sub> H <sub>18</sub> O <sub>3</sub>                                 | 53949-53-4  | 222.3 | 3192   | n. r. | 2.25  | 5.54 x 10 <sup>-12</sup> | n. r.     | n. r. |
| 2-hydroxy ibuprofen *                        | C <sub>13</sub> H <sub>18</sub> O <sub>3</sub>                                 | 51146-55-5  | 222.3 | 2974   | n. r. | 2.3   | 5.54 x 10 <sup>-12</sup> | n. r.     | n. r. |
| Tramadol                                     | C <sub>16</sub> H <sub>25</sub> NO <sub>2</sub>                                | 27203-92-5  | 263.4 | 1151   | 9.41  | 3.01  | 1.54 x 10 <sup>-11</sup> | 5 – 8 h   | 95    |
| 4-aminoantipyrine *                          | C <sub>11</sub> H <sub>13</sub> N <sub>3</sub> O                               | 83-07-8     | 203.2 | 2379   | n. r. | -0.07 | 2.85 x 10 <sup>-12</sup> | 2 – 4 h   | 9     |
| Paracetamol                                  | C <sub>8</sub> H <sub>9</sub> NO <sub>2</sub>                                  | 103-90-2    | 151.2 | 30350  | 9.38  | 0.46  | 1.94 x 10 <sup>-6</sup>  | 1 – 4 h   | 90    |
| Carbamazepine                                | C <sub>15</sub> H <sub>12</sub> N <sub>2</sub> O                               | 298-46-4    | 236.3 | 17.66  | 13.9  | 2.25  | 1.08 x 10 <sup>-10</sup> | 16 – 24 h | 100   |
| Carbamazepine 10,11-<br>epoxide *            | C <sub>15</sub> H <sub>12</sub> N <sub>2</sub> O <sub>2</sub>                  | 36507-30-9  | 252.3 | 276.8  | n. r. | 0.95  | 6.84 x 10 <sup>-13</sup> | n. r.     | n. r. |
| Topiramate                                   | C <sub>12</sub> H <sub>21</sub> NO <sub>8</sub> S                              | 97240-79-4  | 339.4 | 13640  | 8.7   | -0.33 | 8.88 x 10 <sup>-17</sup> | 19 – 25 h | 75    |
| Gabapentin                                   | C <sub>9</sub> H <sub>17</sub> NO <sub>2</sub>                                 | 60142-96-3  | 171.4 | 4491   | 4.72  | -1.1  | 1.81 x 10 <sup>-10</sup> | 5 – 7 h   | 98    |

|                        |                                                                 |             |       |        |       |       |                          |              |       |
|------------------------|-----------------------------------------------------------------|-------------|-------|--------|-------|-------|--------------------------|--------------|-------|
| Levetiracetam          | C <sub>8</sub> H <sub>14</sub> N <sub>2</sub> O <sub>2</sub>    | 102767-28-2 | 170.2 | 7910   | 16.09 | -0.49 | 2.67 x 10 <sup>-10</sup> | 6 – 8 h      | 66    |
| Pregabalin             | C <sub>8</sub> H <sub>17</sub> NO <sub>2</sub>                  | 148553-50-8 | 159.2 | 19630  | 4.23  | -1.78 | 3.08 x 10 <sup>-10</sup> | 6.3 h        | 90    |
| Levodopa               | C <sub>9</sub> H <sub>11</sub> NO <sub>4</sub>                  | 59-92-7     | 197.2 | 320100 | 2.32  | -2.39 | 1.30 x 10 <sup>-18</sup> | 0.75 – 1.5 h | 75    |
| Rasagiline             | C <sub>12</sub> H <sub>13</sub> N                               | 136236-51-6 | 171.2 | 3733   | 8.69  | 2.6   | 1.89 x 10 <sup>-7</sup>  | 3 h          | 67    |
| Diazepam               | C <sub>16</sub> H <sub>13</sub> ClN <sub>2</sub> O              | 439-14-5    | 284.7 | 58.78  | 3.4   | 2.82  | 3.64 x 10 <sup>-9</sup>  | 50 h         | n. r. |
| Clomethiazole          | C <sub>6</sub> H <sub>8</sub> ClNS                              | 533-45-9    | 161.7 | 1041   | 3.22  | 2.12  | 2.18 x 10 <sup>-6</sup>  | 3.6 – 5 h    | 50    |
| Scopolamine            | C <sub>17</sub> H <sub>21</sub> NO <sub>4</sub>                 | 51-34-3     | 303.4 | 55310  | 7.75  | 0.98  | 3.36 x 10 <sup>-16</sup> | 4.5 h        | > 10  |
| Fluoxetine             | C <sub>17</sub> H <sub>18</sub> F <sub>3</sub> NO               | 54910-89-3  | 309.3 | 60.28  | 9.8   | 4.05  | 8.90 x 10 <sup>-8</sup>  | 4 – 6 d      | 95    |
| Citalopram             | C <sub>20</sub> H <sub>21</sub> FN <sub>2</sub> O               | 59729-33-8  | 324.4 | 31.09  | 9.78  | 3.74  | 2.69 x 10 <sup>-11</sup> | 35 h         | 100   |
| Escitalopram           | C <sub>20</sub> H <sub>21</sub> FN <sub>2</sub> O               | 128196-01-0 | 324.4 | 31.09  | 9.80  | 3.74  | 2.69 x 10 <sup>-11</sup> | 27 – 32 h    | 80    |
| Trazodone              | C <sub>19</sub> H <sub>22</sub> ClN <sub>5</sub> O              | 19794-93-5  | 371.9 | 8.24   | 6.74  | 3.21  | 1.74 x 10 <sup>-15</sup> | 5 – 9 h      | 96    |
| Venlafaxine            | C <sub>17</sub> H <sub>27</sub> NO <sub>2</sub>                 | 93413-69-5  | 277.4 | 266.7  | 10.09 | 3.20  | 2.87 x 10 <sup>-11</sup> | 3 – 7 h      | 5     |
| Caffeine               | C <sub>8</sub> H <sub>10</sub> N <sub>4</sub> O <sub>2</sub>    | 58-08-2     | 194.2 | 2632   | 10.4  | -0.07 | 3.58 x 10 <sup>-11</sup> | 3 – 7 h      | 100   |
| Donepezil              | C <sub>24</sub> H <sub>29</sub> NO <sub>3</sub>                 | 120014-06-4 | 379.5 | 2.93   | 8.62  | 4.86  | 1.22 x 10 <sup>-12</sup> | 70 h         | 15    |
| Memantine              | C <sub>12</sub> H <sub>21</sub> N                               | 19982-08-2  | 179.3 | 31.09  | 10.27 | 3.28  | 2.69 x 10 <sup>-11</sup> | 60 – 100 h   | 48    |
| Dichlorobenzyl alcohol | C <sub>7</sub> H <sub>6</sub> Cl <sub>2</sub> O                 | 1777-82-8   | 177.0 | 1762   | n. r. | 2.36  | 3.38 x 10 <sup>-8</sup>  | n. r.        | 90    |
| Amylmetacresol         | C <sub>12</sub> H <sub>18</sub> O                               | 1300-94-3   | 178.3 | 26.6   | 10.54 | 4.57  | 2.12 x 10 <sup>-6</sup>  | 1.15 h       | 50    |
| Budesonide             | C <sub>25</sub> H <sub>34</sub> O <sub>6</sub>                  | 51333-22-3  | 430.5 | 11.61  | 17.87 | 1.90  | 6.56 x 10 <sup>-13</sup> | 2 – 3.6 h    | 60    |
| Fluticasone            | C <sub>22</sub> H <sub>27</sub> F <sub>3</sub> O <sub>4</sub> S | 90566-53-3  | 444.5 | 102    | n. r. | 1.40  | 2.29 x 10 <sup>-9</sup>  | 10 h         | < 5   |
| Tiotropium bromide     | C <sub>19</sub> H <sub>22</sub> NO <sub>4</sub> S <sub>2</sub>  | 139404-48-1 | 392.5 | 34140  | 10.35 | -1.76 | 2.33 x 10 <sup>-21</sup> | 5 – 6 d      | 74    |
| Acetylcysteine         | C <sub>5</sub> H <sub>9</sub> NO <sub>3</sub> S                 | 616-91-1    | 163.2 | 242900 | 3.24  | -0.66 | 1.72 x 10 <sup>-13</sup> | 5.6 h        | 33    |
| Dextromethorphan       | C <sub>18</sub> H <sub>25</sub> NO                              | 125-71-3    | 271.4 | 74.65  | 9.13  | 3.97  | 1.20 x 10 <sup>-7</sup>  | 2 – 4 h      | 50    |
| Cloperastine           | C <sub>20</sub> H <sub>24</sub> ClNO                            | 3703-76-2   | 329.9 | 3.593  | 8.69  | 5.11  | 2.83 x 10 <sup>-9</sup>  | n. r.        | 50    |
| Dexchlorpheniramine    | C <sub>16</sub> H <sub>19</sub> ClN <sub>2</sub>                | 25523-97-1  | 274.8 | 4529   | 9.2   | 3.38  | 4.07 x 10 <sup>-10</sup> | 21 – 27 h    | 50    |



## Results and discussion

### *Mass spectral characterization*

Mass spectral characterization for target compounds was organized by ATC code for selected pharmaceuticals, including their metabolites, and the internal standards. **Error! Reference source not found.** shows the fragments of the compounds studied.

### *Alimentary tract and metabolism class (A)*

Herein, the pharmaceuticals studied were acetylsalicylic acid, salicylic acid, ranitidine, omeprazole, pantoprazole, esomeprazole and vildagliptin. Acetylsalicylic acid, also called aspirin, is one of the most common nonsteroidal anti-inflammatory drugs (NSAIDs) which has a molecular weight of 180 g mol<sup>-1</sup>. The compound showed the intense protonated molecule at  $m/z$  137 [M-COCH<sub>3</sub>]<sup>+</sup> because in solution rapidly degrades to salicylic acid (Mw 137 g mol<sup>-1</sup>). Product ions from this precursor were reported at  $m/z$  93 [C<sub>6</sub>H<sub>5</sub>O]<sup>+</sup> and at  $m/z$  65 [C<sub>5</sub>H<sub>5</sub>]<sup>+</sup>. The main metabolite of aspirin is salicylic acid, produced by the loss of an acetyl group. The protonated molecular ion was at  $m/z$  137, sharing the molecular ion and the product ions with aspirin. Similar results for salicylic acid were reported by R. López-Serna et al. who included the formation of the same product ions (López-Serna et al., 2012).

On the other hand, ranitidine is described as a pharmaceutical for acid disorders. It had the molecular ion at  $m/z$  315 [M+H]<sup>+</sup>, and the product ions at  $m/z$  176 [C<sub>5</sub>H<sub>10</sub>N<sub>3</sub>SO<sub>2</sub>]<sup>+</sup> and  $m/z$  130 [C<sub>4</sub>H<sub>8</sub>N<sub>3</sub>O<sub>2</sub>]<sup>+</sup>. The transitions 315>176 and 315>130 were used as a quantification and confirmation purposes. Althakafy et al. determined this pharmaceutical in treated wastewater samples with the same precursor ion and confirmation ion at  $m/z$  176, but reported another confirmation ion at  $m/z$  224 (Althakafy et al., 2017). Pedrouzo et al. studied eleven pharmaceuticals in various water sources and reported another confirmation ion at  $m/z$  270 corresponding to the fragment [C<sub>11</sub>H<sub>16</sub>N<sub>3</sub>SO<sub>3</sub>]<sup>+</sup> (Pedrouzo et al., 2008). Esomeprazole is the S-isomer of omeprazole, both with the same molecular weight and as result, they share the molecular ion 346 [M+H]<sup>+</sup>. Moreover, they have the same product ions, which were formed at  $m/z$  198 [C<sub>9</sub>H<sub>12</sub>NSO<sub>2</sub>]<sup>+</sup> and at  $m/z$  136 [C<sub>8</sub>H<sub>10</sub>NO]<sup>+</sup>. A previous study about the determination of voriconazole and other co-administered drugs in plasma of pediatric cancer patients using UPLC-MS/MS reported the same transition than in the present work (Al-ghobashy et al., 2018). Another study determined EOCs that included omeprazole with the transitions 346>197 and 346>179 for quantification and confirmation purposes (Jiang et al., 2014). Pantoprazole gave in the full scan spectrum the protonate molecular ion at  $m/z$  384 [M+H]<sup>+</sup>, with two product ions at  $m/z$  200 [C<sub>8</sub>H<sub>10</sub>NO<sub>3</sub>S]<sup>+</sup> and  $m/z$  138 [C<sub>7</sub>H<sub>8</sub>NO<sub>2</sub>]<sup>+</sup>.

On the other hand, vildagliptin gave the protonate molecular ion at  $m/z$  304 [M+H]<sup>+</sup>. Two product ions were formed at  $m/z$  154 [C<sub>7</sub>H<sub>12</sub>N<sub>3</sub>O]<sup>+</sup> and at  $m/z$  97 [C<sub>5</sub>H<sub>9</sub>N<sub>2</sub>]<sup>+</sup>, agree with the transitions obtained by the study of vildagliptin and other antidiabetic drugs in aqueous environmental samples analysed by HPLC-TOF (Martín et al., 2012) and in human plasma by HILIC-MS/MS (Pontarolo et al., 2014). Ascorbic acid gave in the full scan spectrum the precursor ion at  $m/z$  177 [M+H]<sup>+</sup>, and two product ions at  $m/z$  141 [M+H-2H<sub>2</sub>O]<sup>+</sup> and at  $m/z$  95 [C<sub>5</sub>H<sub>3</sub>O<sub>2</sub>]<sup>+</sup>.

### *Cardio-vascular system (C)*

Herein, the pharmaceuticals studied in this group were amiodarone, hydrochlorothiazide, furosemide, pentoxifylline, lidocaine, propranolol, atenolol, verapamil, enalapril, enalaprilat, losartan, valsartan, simvastatin, rosuvastatin and ezetimibe. Amiodarone was analysed by UPLC-MS/MS providing a full scan spectrum with a precursor ion at  $m/z$  646 [M+H]<sup>+</sup>. From this molecular ion, two fragment ions were formed at  $m/z$  201 [C<sub>13</sub>H<sub>13</sub>O<sub>2</sub>]<sup>+</sup> and at  $m/z$  100 [C<sub>6</sub>H<sub>14</sub>N]<sup>+</sup>. Hydrochlorothiazide is a diuretic medication used to treat high blood pressure and swelling due to fluid build-up. It presented a molecular ion at  $m/z$  296 [M-H]<sup>-</sup> as it was ionized better in negative mode. From this precursor ion, two fragments ions were formed at  $m/z$  269 [C<sub>6</sub>H<sub>5</sub>ClN<sub>2</sub>O<sub>4</sub>S<sub>2</sub>]<sup>-</sup> and at  $m/z$  205, these transitions were used for confirmation and quantification purposes, respectively. Baena-Nogueras et al. developed and validated an analytical method for the determination of 83 pharmaceuticals in aqueous samples, including hydrochlorothiazide, and also reported the

same protonated ion and fragment ions (Baena-Nogueras et al., 2016). In addition, López-Serna et al. developed and validated another analytical method to determine 58 pharmaceuticals and 19 metabolites in environmental samples, which also confirmed the same transitions for quantification and confirmation purposes of hydrochlorothiazide (López-Serna et al., 2012). Furosemide is used to treat fluid build-up due to heart failure, liver scarring, or kidney disease. Using  $m/z$  329  $[M-H]^-$  as precursor ion, it exhibited at  $m/z$  285  $[C_{11}H_{10}ClN_2O_3S]^-$  the most intense product ion and at  $m/z$  205  $[C_{11}H_8ClNO]^-$  the second major product ion, at 13 eV and 20 eV of C.E. respectively. The SRM transition of both  $m/z$  were used for confirmation and quantification purposes, and the same product ions were reported in study mentioned before, carried out by Baena-Nogueras et al. (Baena-Nogueras et al., 2016).

Pentoxifylline gave in the full scan spectrum the molecular ion at  $m/z$  279  $[M+H]^+$ . From this precursor ion, two transitions were reported at  $m/z$  181  $[C_7H_9N_4O_2]^+$  and  $m/z$  138  $[C_6H_8N_3O]^+$ , corresponding to the highest intense transitions obtained. Gurke et al. developed a SPE-HPLC-MS/MS method to determinate pharmaceuticals and related metabolites in urban sewage samples of Germany, using the same transitions to quantify pentoxifylline in water samples (Gurke et al., 2015). Lidocaine is a local anesthetic that gave a full scan spectrum with the precursor ion at  $m/z$  235  $[M+H]^+$  and two fragment ions at  $m/z$  86  $[C_5H_{12}N]^+$  and at  $m/z$  58  $[C_4H_{10}]^+$ . Propranolol is a nonselective beta blocker widely prescribed to treat high blood pressure and a number of heart dysrhythmias. When it was analysed with the MS/MS detector, it showed a molecular ion at  $m/z$  260  $[M+H]^+$ , and two fragment ions at  $m/z$  183  $[C_{10}H_{17}NO_2]^+$  corresponding to the quantification transition and  $m/z$  157  $[C_{11}H_9O]^+$  for confirmation purposes. Oertel et al. developed an analytical method to quantify antidiabetic drugs using an HILIC column to acquire the chromatographic separation. They used the same precursor ions reported before for lidocaine and propranolol, but for propranolol proposed fragment ions at  $m/z$  116 and  $m/z$  183 (Oertel et al., 2018).

Another pharmaceutical included in this group is atenolol that gave in the full scan spectrum the precursor ion at  $m/z$  267  $[M+H]^+$ , obtaining its highest intensity at 41 V of C.V. A SIM-SCAN method was performed obtaining two transitions at  $m/z$  145 corresponding to the fragment  $[C_7H_{15}NO_2]^+$  and at  $m/z$  74  $[C_4H_{12}N]^+$ . This compound was analysed by Baena-Nogueras et al., who optimized and validated an analytical method for pharmaceuticals in Spain, reporting the transitions 267>145 for quantification purposes and 267>73 for confirmation purposes for atenolol (Baena-Nogueras et al., 2016). However, López-Serna et al., who developed an analytical method for pharmaceuticals and metabolites in environmental water samples, reported two different fragment ions at  $m/z$  145 for both compounds, and at  $m/z$  190 for atenolol (López-Serna et al., 2012). Verapamil is a phenylalkylamine derivative used as calcium channel blocker with direct cardiac effects. It gave a full scan spectrum with a protonated molecule at  $m/z$  455  $[M+H]^+$  at 31 V of C.V. MS/MS spectrum from this precursor ion produced a fragment ion at  $m/z$  165  $[C_{10}H_{13}O_2]^+$  using 30 eV of C.E., whereas the other fragment ion was obtained using 40 eV of C.E. at  $m/z$  150  $[C_9H_{10}O_2]^+$ . The same transitions 455>165 and 455>150 were reported by García-Galán et al., who developed an analytical methodology based on dual column liquid chromatography coupled to tandem mass spectrometry to analyse 12 pharmaceuticals and 20 metabolites in influent and effluent wastewaters and surface water (García-Galán et al., 2016).

Nevertheless, enalapril is a medication used to treat high blood pressure, diabetic kidney disease and heart failure. The mass spectral produced the precursor ion at  $m/z$  377  $[M+H]^+$ , and two fragment ions selected at  $m/z$  234  $[C_{14}H_{20}NO_2]^+$  and at  $m/z$  117  $[C_5H_{10}NO_2]^+$ . For this pharmaceutical was chosen a metabolite called enalaprilat, that has a molecular weight of 348.4 g mol<sup>-1</sup> corresponding a protonated molecule at  $m/z$  349  $[M+H]^+$ . MS/MS spectra from the precursor ion produced a fragment ion at  $m/z$  206  $[C_{12}H_{16}NO_2]^+$  using 16 eV of C.E., whereas a fragment ion at  $m/z$  91  $[C_7H_7]^+$  was obtained using 40 eV of C.E. Similar results were reported by Gurke et al., who analysed prescribed pharmaceuticals and metabolites in influent and effluent samples of the sewage treatment plant with SPE-HPLC-MS/MS. They acquired the same product ions for enalapril (Gurke et al., 2015). On the other hand, López-Serna et al. developed an analytical method for the determination of pharmaceuticals and metabolites in environmental waters, and also reported the same product ions for enalapril and enalaprilat, according with the transitions acquired in this study (López-Serna et al., 2012).

Losartan gave a full scan spectrum with a precursor ion at  $m/z$  423  $[M+H]^+$ , and two intense fragments at  $m/z$  377 and at  $m/z$  207. Valsartan is an angiotensin II receptor antagonist that showed its protonated molecule at  $m/z$  436  $[M+H]^+$ . Using 20 V for C.V., valsartan produced two main fragments ions at  $m/z$  291  $[C_{16}H_{13}N_5O]^+$  and at  $m/z$  235  $[C_{14}H_{11}N_4]^+$  corresponding to the loss of  $C_{10}H_{17}NO_2$  molecule. Both pharmaceuticals were reported in an analytical method developed to analyse pharmaceuticals and metabolites in urban sewage, with the same transitions for parent ions and fragments ions (Gurke et al., 2015). Simvastatin showed a full scan spectrum with a protonated ion at  $m/z$  419  $[M+H]^+$ . Using 34 V of C.V., two intense product ions were acquired at  $m/z$  199  $[C_{11}H_{19}O_3]^+$  for quantification purposes and at  $m/z$  285 for confirmation purposes. Similar results were reported by Kafeenah et al. who analysed multi-class pharmaceutical residues in tap water and hospital residues, and reported the same fragment ions and transitions for this drug (Kafeenah et al., 2018). In another way, rosuvastatin is a hydroxy-methyl glutaryl coenzyme A reductase inhibitor. Using  $m/z$  482  $[M+H]^+$  as precursor ion, it exhibited  $m/z$  258  $[300-C_3H_6]^+$  as the most intense product ion and  $m/z$  300  $[M-C_4H_{11}N_3O_2SF]^+$  as the second major product ion. The last pharmaceutical included in this group is ezetimibe, which is a cholesterol-lowering medication, used to prevent the absorption of cholesterol in the intestine. In this case, the precursor ion was acquired at  $m/z$  392  $[M-H_2O+H]^+$  as corresponded to the loss of a water molecule from the initial structure, and two product ions with highest intensity were at  $m/z$  133  $[C_9H_9O]^+$  and at  $m/z$  105  $[C_7H_5O]^+$ .

#### *Genito urinary system and sex hormones (G)*

Herein, the pharmaceuticals studied were estrone, cyproterone and dutasteride. Estrone is an estrogenic hormone. When it was analysed by LC-MS/MS provided a molecular ion at  $m/z$  271  $[M+H]^+$  with the highest intensity at 40 V of C.V. This precursor ion exhibited at  $m/z$  253  $[C_{18}H_{21}O]^+$  and at  $m/z$  133  $[C_9H_9O]^+$  two fragment ions used to quantify and confirm. The transition 271>53 corresponded to the loss of a water molecule and the transition 271>133 is formed by the loss of a  $C_9H_{13}O$  molecule. Cyproterone is a steroidal antiandrogen with a molecular weight of 374.9 g mol<sup>-1</sup>, while its precursor ion (cyproterone acetate) was found at  $m/z$  417  $[C_{24}H_{29}ClO_4]^+$ . Cyproterone exhibited at  $m/z$  313  $[M-C_4H_6O_3]^+$  and at  $m/z$  357  $[M-C_2H_3O_2]^+$  two fragment ions used to quantify and confirm it. On the other hand, dutasteride had also studied as it is a medication used to treat the symptoms of an enlarged prostate, it gave a full scan mass spectra with a protonated molecule at  $m/z$  529  $[M+H]^+$  and two fragment ions were reported at  $m/z$  461  $[C_{26}H_{32}F_3N_2O_2]^+$  and at  $m/z$  69  $[C_3H_3NO]^+$ .

#### *Systemic hormonal preparations, excl. sex hormones and insulins (H)*

With full scan LC-MS/MS, prednisone produced the protonated molecule at  $m/z$  359  $[M+H]^+$ . MS/MS spectra from this precursor ion using 11 eV of C.E. produced the fragment ions at  $m/z$  341  $[M-H_2O]^+$  and using 36 eV of C.E. produced  $m/z$  147  $[C_{10}H_{11}O]^+$ . Both 359>341 and 359>147 were used as SRM transitions and are depicted in **Error! Reference source not found..**

#### *Anti-infective for systemic use (J)*

Herein, the pharmaceuticals studied were amoxicillin, sulfapyridine, sulfamethoxazole, N<sup>4</sup>-acetyl-sulfamethoxazole, sulfadiazine, erythromycin, clarithromycin, ciprofloxacin, norfloxacin and levofloxacin. Amoxicillin is a common antibiotic and it gave a full scan spectrum with a protonated molecule with the loss of a water molecule at  $m/z$  349  $[M-H_2O+H]^+$  at 56 V of C.V. and two intense product ions at  $m/z$  255  $[C_{10}H_{13}N_3O_3S]^+$  which corresponds to the loss of the ring of six carbon atoms connected to the alcohol group and at  $m/z$  107 (**Error! Reference source not found.**). The SRM transitions 349>107 and 349>255 were chosen for quantification and confirmation purposes. A study carried out by Althakafy et al. developed an analytical method to detect 13 PPCPs in water samples, they reported a precursor ion at  $m/z$  366 and two fragment ions at  $m/z$  160 and at  $m/z$  207 to identify amoxicillin (Althakafy et al., 2017). Whereas another study by Baena-Nogueras et al., who developed an analytical method to determine 83 pharmaceuticals in aqueous samples, reported two other fragment ions at  $m/z$  349 and at  $m/z$  114 (Baena-Nogueras et al., 2016). Otherwise, sulfapyridine was a sulphanilamide antibacterial medication, no longer

prescribed to treat infections in humans, only employed in veterinary medicine. At  $m/z$  250  $[M+H]^+$  was obtained the precursor ion, and also, the most intense fragment ions were at  $m/z$  156  $[C_6H_6NO_2S]^+$  and at  $m/z$  95  $[C_5H_7N_2]^+$ . The fragment ion at  $m/z$  156 was in accordance with one reported by García-Galán et al., who developed an analytical methodology based on dual column liquid chromatography coupled to tandem mass spectrometry to analyse 12 pharmaceuticals and 20 metabolites in influent and effluent wastewaters and surface water, the other fragment ion reported by these authors was at  $m/z$  92 with 26 eV as C.E. (García-Galán et al., 2016).

Sulfamethoxazole gave a full scan spectrum with a protonated molecule at  $m/z$  254  $[M+H]^+$ . From this precursor ion, the product ions selected were at  $m/z$  108  $[C_6H_6NO]^+$  and at  $m/z$  92  $[C_6H_6N]^+$  as quantification and confirmation purposes. Pedrouzo et al. described a method to determine 11 pharmaceuticals in various water sources by SPE-LC-ESI-MS. The fragment ions reported by Pedrouzo et al. were in accordance with the transition  $254 > 108$ , and also, acquired other fragment ion at  $m/z$  156 corresponding to a  $C_6H_6NO_2S$  molecule (Pedrouzo et al., 2008). Another scientific group comprised by Babié et al. developed an analytical method for multi-class pharmaceuticals in wastewater, and also, reported the fragment ion at  $m/z$  92. In addition, in accordance with the study of Pedrouzo et al., reported the transition of  $254 > 156$  as the second product ion (Babié et al., 2010). Moreover, this pharmaceutical has several metabolites including N<sup>4</sup>-acetyl-sulfamethoxazole that was selected to be analysed in this study. Its precursor ion was obtained at  $m/z$  296  $[M+H]^+$  with 21 V, whereas the two fragment ions selected were at  $m/z$  198  $[C_8H_8NO_3S]^+$  and at  $m/z$  65  $[SO_2]^+$ . Similar results were reported by García-Galán et al. who developed an analytical methodology based on dual column liquid chromatography coupled to tandem mass spectrometry to analyse 12 pharmaceuticals and 20 metabolites in aqueous samples, and also, indicated two product ion from this metabolite at  $m/z$  65 and at  $m/z$  134 (García-Galán et al., 2016).

Sulfadiazine is an antibiotic that produced a protonated molecule at  $m/z$  251  $[M+H]^+$ , the most intense fragment ions were at  $m/z$  156  $[C_6H_6NO_2S]^+$  and at  $m/z$  96  $[C_4H_6N_3]^+$ . Similar results were reported by García-Galán et al. (García-Galán et al., 2016) and Babié et al. (Babié et al., 2010) providing the fragment ions at  $m/z$  156 and at  $m/z$  92, in accordance with one of the product ions acquired. Also, Pedrouzo et al. described a method to determine eleven pharmaceuticals in various water sources by SPE and LC-MS, and reported another fragment ion at  $m/z$  108 which correspond to a protonated fragment of  $[C_6H_6NO]^+$  (Pedrouzo et al., 2008). Clarithromycin is the 6-O-methyl ether of erythromycin, they are macrolide antibiotics used in the treatment of respiratory-tract, skin and soft-tissue infections. Clarithromycin produced a protonated molecule at  $m/z$  748  $[M+H]^+$  whereas erythromycin's protonated molecule was at  $m/z$  734  $[M+H]^+$ . Both pharmaceuticals formed the same fragment ions at  $m/z$  158  $[C_8H_{16}NO_2]^+$  and at  $m/z$  116  $[C_6H_{14}NO]^+$ . In addition, both compounds were analysed by SPE-UPLC-MS/MS by Baena-Nogueras et al., who developed and validated an analytical method for 83 pharmaceuticals in aqueous samples, and obtained the product ion at  $m/z$  158. Moreover, erythromycin was characterised by the transition  $734 > 575$  and clarithromycin by  $748 > 590$  (Baena-Nogueras et al., 2016).

Ciprofloxacin is another antibiotic used to treat bacterial infections, and when it is analysed by LC-MS/MS produced a protonated molecule at  $m/z$  332  $[M+H]^+$ . Using 40 V as C.V., two fragment ions were reported at  $m/z$  314  $[C_{17}H_{17}FN_3O_2]^+$  and at  $m/z$  245  $[C_{13}H_9FNO_3]^+$ . Apart from the reported product ions, Babié et al. developed an analytical method for multi-class pharmaceuticals in wastewater and reported another fragment ion at  $m/z$  288 (Babié et al., 2010). In accordance with them, Althakafy et al. who developed an analytical method to detect and confirm 13 PPCPs in water samples, also reported the same fragment ion at  $m/z$  288 (Althakafy et al., 2017). Norfloxacin belong to a class of fluoroquinolone antibiotics, and it gave a full scan spectrum with a precursor ion at  $m/z$  320  $[M+H]^+$ . Using 22 V of C.V., two fragment ions were obtained at  $m/z$  302  $[C_{16}H_{17}FN_3O_2]^+$  and at  $m/z$  276  $[C_{14}H_{13}FN_2O_3]^+$ . Similar results were reported by Babié et al. (Babié et al., 2010) who determine the same product ions, and also, Baenas-Nogueras et al. used the fragment ion at  $m/z$  231 to identify norfloxacin in their samples (Baena-Nogueras et al., 2016). The last pharmaceutical included in this group is levofloxacin, that gave a protonated ion at  $m/z$  362  $[M+H]^+$  and two fragment ions at  $m/z$  318  $[C_{17}H_{21}FN_3O_2]^+$  and at  $m/z$  261  $[C_{13}H_8FNO_4]^+$ , with a C.V. of 44 V and C.E. of 18 eV and 26 eV, respectively. The transitions  $362 > 318$  and  $362 > 261$  were in accordance with those reported by Oertel et al., who developed an analytical method to quantify

antidiabetic drugs in WWTPs in Germany using an HILIC column to acquire the chromatographic separation to retain the most polar compounds from the aqueous matrix (Oertel et al., 2018).

#### *Antineoplastic and immunomodulating agents (L)*

Herein, the pharmaceuticals studied were cyclophosphamide, ifosfamide, bicalutamide and mycophenolic acid. Cyclophosphamide and ifosfamide are a chemotherapy medication and showed a common protonated ion at  $m/z$  261  $[M+H]^+$  as they are structural isomers. Even though, different product ions were obtained for both pharmaceuticals. Using 26 V of C.V., cyclophosphamide reported two product ions at  $m/z$  140  $[C_4H_8NCl_2]^+$  and at  $m/z$  106  $[C_4H_8NCl]^+$ , and using 42 V of C.V. for ifosfamide were at  $m/z$  154  $[C_3H_7NO_2PCl]^+$  and at  $m/z$  78  $[C_2H_5NCl]^+$ .

Megestrol is a progestin of the 17- $\alpha$ -hydroxyprogesterone group included in this study that provided a protonated ion at  $m/z$  385  $[M+H]^+$ . From this precursor, two fragment ions were obtained at  $m/z$  325  $[C_{22}H_{29}O_2]^+$  and at  $m/z$  267 for quantification and confirmation purposes. Bicalutamide is an antiandrogen medication that showed a full scan mass spectrum with a precursor ion at  $m/z$  431  $[M+H]^+$ . Using 33 V as C.V., two product ions were formed at  $m/z$  217  $[C_9H_{10}O_3SF]^+$  with 14 eV of C.E. and at  $m/z$  95  $[C_6H_4F]^+$  with 50 eV of C.E. The last pharmaceutical included in this group is mycophenolic acid, classified as a common immunosuppressant drug, that provided a protonated ion at  $m/z$  321  $[M+H]^+$ . Two product ions were obtained at  $m/z$  207  $[C_{11}H_{11}O_4]^+$  formed by the loss of a  $C_6H_8O_2$  molecule and at  $m/z$  159  $[C_9H_5O_3]^+$ , for quantification and confirmation purposes.

#### *Musculoskeletal system (M)*

Herein, the pharmaceuticals studied were diclofenac, N-(2,6-dichlorophenyl)-2-indolinone, ibuprofen, 1-hydroxy and 2-hydroxy ibuprofen. Diclofenac is an analgesic and anti-inflammatory drug that gave the protonated ion at  $m/z$  296  $[M+H]^+$  at 9 V of C.V. From this precursor, the two transitions optimized at 296>215 and 296>250 were chosen for quantification and confirmation purposes, with a C.E. of 20 eV and 12 eV, respectively. Larabie et al. determine diclofenac and other residue of pharmaceuticals in fish plasma using LC-MS/MS, and also, they reported the same product ions as had been indicated previously (Larabie et al., 2017). Whereas another study published the analysis of this pharmaceutical in aqueous environmental matrices by SPE-UHPLC-MS/MS in negative ionization mode, reporting a precursor ion at  $m/z$  294  $[M-H]^-$  and two product ions at  $m/z$  250 as quantifier and at  $m/z$  35 as qualifier (Paíga et al., 2017). Moreover, for this pharmaceutical was selected a metabolite called N-(2,6-dichlorophenyl)-2-indolinone with a precursor ion at  $m/z$  278  $[M+H]^+$ . Using 40 V as a C.V., the two fragment ions with the highest intensity were at  $m/z$  208  $[C_{14}H_9NO]^+$  and at  $m/z$  214 with 20 eV as C.E. both. Similar results were reported by García-Galán, who developed an analytical method based on dual column LC-MS/MS to analyse 12 pharmaceuticals and 20 metabolites in wastewaters and surface waters (García-Galán et al., 2016).

Another pharmaceutical included in this group is ibuprofen, a NSAID used to treat pain, fever and inflammation. It gave a full scan spectrum with a protonated molecule with the loss of carboxylic acid moiety at  $m/z$  161  $[M-COOH]^+$ , and two intense fragment ions at  $m/z$  119  $[C_9H_{11}]^+$  and at  $m/z$  105  $[C_8H_9]^+$ . As had been observed for the other analgesic mentioned before, some studies reported the ionization in positive mode whereas others acquired the ionization of the pharmaceutical in negative mode. For instance, Paíga et al. determined seven pharmaceuticals and two metabolites by SPE-UHPLC-MS/MS in seawater samples of Atlantic Ocean (Paíga et al., 2017) and Kafeenah et al. analysed multi-class pharmaceutical residues in tap water and hospital residues (Kafeenah et al., 2018), both reporting the ionization of ibuprofen in negative mode, with the precursor ion at  $m/z$  205  $[M-H]^-$  and the product ions at  $m/z$  159  $[M-H-CO_2]^-$  and at  $m/z$  161.

On the other hand, similar results as reported previously in this study in positive mode were acquired by Hijosa-Valsero et al. who studied the behaviour of PPCPs in constructed wetland compartments like influent, effluent, pore water, substrate and plants roots (Hijosa-Valsero et al., 2016). Ibuprofen is one of the most prescribed pharmaceuticals, for this reason, studying its metabolites was of interest. The selected metabolites are 1-hydroxy and 2-hydroxy ibuprofen, they

are isomers and has the same molecular weight. When they were analysed by LC-MS/MS, produced a protonated molecule at  $m/z$  223  $[M+H]^+$  and two fragment ions at  $m/z$  207  $[C_{12}H_{15}O_3]^+$  and  $m/z$  193  $[C_{11}H_{13}O_3]^+$ .

#### *Nervous system (N)*

Herein, the pharmaceuticals studied were tramadol, 4-aminoantipyrine, 4-acetamidoantipyrine, paracetamol, carbamazepine, carbamazepine 10,11-epoxide, topiramate, gabapentin, levvetiracetam, pregabalin, levodopa, rasagiline, diazepam, clomethiazole, scopolamine, fluoxetine, citalopram, escitalopram, trazodone, venlafaxine, caffeine, donepezil and memantine. Tramadol is an opioid pain medication that gave a full scan spectrum with a protonated ion at  $m/z$  264  $[M+H]^+$ . Using 9 V as C.V., it produced two fragment ions at  $m/z$  246  $[C_{16}H_{24}NO]^+$  and at  $m/z$  58  $[C_3H_8N]^+$  with 10 eV and 17 eV as C.E., respectively. Similar results were reported by Gurke et al. who developed a SPE-HPLC-MS/MS method for the determination of the most prescribed pharmaceuticals and their related metabolites in urban sewage samples in Germany, and reported the analysis of tramadol using the transition 264>58 as mentioned before (Gurke et al., 2015). On the other hand, the full scan spectrum of 4-aminoantipyrine showed a protonated molecule at  $m/z$  204  $[M+H]^+$  with 20 V of C.V., and the two fragment ions with the highest intensity were at  $m/z$  94  $[C_6H_8N]^+$  and at  $m/z$  56  $[C_3H_6N]^+$ . Another pharmaceutical included in this group is paracetamol that gave a full scan spectrum with a protonated molecule at  $m/z$  152  $[M+H]^+$ . Using 32 V of C.V., the most intense product ions were obtained at  $m/z$  110  $[C_6H_8NO]^+$  corresponding to the loss of  $C_2H_3O$  at 20 eV of C.E., and at  $m/z$  93  $[C_6H_5O]^+$  formed by the loss of  $C_2H_4NO$  at 22 eV of C.E. In positive ionization, similar results were reported by Kafeenah et al. who analysed multi-class pharmaceutical residues in tap water and hospital residues, and proposed the same protonated molecule and was in accordance with one product ion at  $m/z$  110 (Kafeenah et al., 2018), and also, García-Galán et al., who developed an analytical method to analyse pharmaceuticals and metabolites in wastewaters and surface waters, reported another product ion at  $m/z$  65 corresponding to the loss of a  $COCH_3$  molecule (García-Galán et al., 2016). Whereas, Baena-Nogueras et al., who developed and validated an analytical method for the determination of 83 pharmaceuticals in aqueous samples (Baena-Nogueras et al., 2016), and Paíga et al., who developed a multi-residue method for the analysis of 33 human and veterinary pharmaceuticals, and some of their metabolites in drinking water, surface water and wastewater (Paíga et al., 2017), reported the molecular ion in negative ionization at  $m/z$  150  $[M-H]^-$  and two product ions at  $m/z$  108 and at  $m/z$  106.

Carbamazepine is used in the treatment of epilepsy and neuropathic pain, it was analysed showing a protonated molecule at  $m/z$  237  $[M+H]^+$  and two product ions at  $m/z$  194  $[C_{14}H_{12}N]^+$  and at  $m/z$  179  $[C_{14}H_{11}]^+$ . The highest intensity of the C.V. was acquired at 30 V, for the C.E. were at 20 eV and 36 eV respectively for each product ion. Similar results were reported for the analysis of micropollutants in unfiltered wastewater and freshwater by LC-MS/MS, acquiring the same protonated ion and showing the fragment ion at  $m/z$  194 (Asimakopoulos et al., 2017). One metabolite of this drug, carbamazepine 10,11-epoxide, was selected to be analysed providing a precursor ion at  $m/z$  253  $[M+H]^+$ . Using 29 V of C.V., the two product ions with the highest intensity were at  $m/z$  236  $[C_{15}H_{10}NO_2]^+$  and at  $m/z$  210  $[C_{14}H_{10}NO]^+$  corresponding to the loss of an amine molecule and an amide molecule, respectively. This metabolite was acquired by García-Galán et al., who developed a method to analyse pharmaceuticals and metabolites in wastewaters and surface waters with LC-MS/MS, and reported the same protonated ion and different fragment ions at  $m/z$  180 and at  $m/z$  210 (García-Galán et al., 2016).

Another pharmaceutical is topiramate, used to treat epilepsy and prevent migraines. It gave a full scan spectrum with a protonated ion at  $m/z$  340  $[M+H]^+$  with a C.V. of 18 V, and two fragment ions at  $m/z$  264  $[C_9H_{14}NO_6S]^+$  and at  $m/z$  127  $[C_7H_{11}O_2]^+$ . Gabapentin showed the protonated molecule at  $m/z$  172  $[M+H]^+$  with the highest intensity at 27 V of C.V. Using this precursor ion, gabapentin exhibited at  $m/z$  154  $[C_9H_{16}NO]^+$  the most intense fragment ion used for confirmation purpose, which corresponds to the loss of a water molecule, and at  $m/z$  137  $[C_9H_{14}O]^+$  associated with the fragmentation of the water molecule and an amine group, used for quantification purpose. Gurke et al., who developed a SPE-HPLC-MS/MS method for the determination of the most

prescribed pharmaceuticals and their related metabolites in urban sewage samples in Germany, reported similar results for the pharmaceutical topiramate as one fragment ion is in common corresponding to the ion at  $m/z$  264 and also, different transition corresponding to  $357 > 282$ ; for gabapentin the same transitions were reported  $172 > 154$  and  $172 > 137$  (Gurke et al., 2015). Another pharmaceutical included in this group is levetiracetam, which is an anticonvulsant medication used as a treatment for specific types of epilepsy. Levetiracetam gave an intense protonated ion at  $m/z$  171  $[M+H]^+$  and the fragment ions used for quantification and confirmation purposes at  $m/z$  154  $[C_8H_{12}NO_2]^+$ , which corresponds to the loss of an amine, and at  $m/z$  126  $[C_7H_{12}NO]^+$ .

Pregabalin is a medication used to treat epilepsy, by LC-MS/MS this pharmaceutical formed the protonated molecule at  $m/z$  160  $[M+H]^+$ . The ion products generated were at  $m/z$  142  $[C_8H_{14}O_2]^+$  corresponding to the loss of an amine molecule and at  $m/z$  84  $[C_6H_{12}]^+$  formed by the loss of COOH-CH<sub>3</sub> and amine molecules. Several studies have already determinate this pharmaceuticals family such as Gómez-Canela et al. (Gómez-Canela et al., 2019), Asimakopoulos et al. (Asimakopoulos et al., 2017) or Gurke et al. (Gurke et al., 2015). Another pharmaceutical from this group is levodopa, which exhibited a molecular ion at  $m/z$  198  $[M+H]^+$ . Using 45 V as C.V., the two fragment ions with the highest intensity were at  $m/z$  152  $[C_8H_{10}NO_2]^+$  and at  $m/z$  107  $[C_6H_5O_2]^+$ . Vilhena et al. developed a new HILIC-MS/MS method for the analysis of carbidopa, levodopa and its metabolites in human plasma; reporting the same protonated ions for levodopa and deuterated levodopa, and different transitions as  $198 > 181$  for levodopa confirmation purposes (Vilhena et al., 2014). Rasagiline showed the protonated molecule at  $m/z$  172  $[M+H]^+$  in its full scan spectrum, which also reported two fragment at  $m/z$  117  $[C_9H_9]^+$  and at  $m/z$  91  $[C_7H_7]^+$ . The fragment ion at  $m/z$  117 is formed by the loss of a C<sub>3</sub>H<sub>4</sub>N molecule and the ion at  $m/z$  91 corresponds to the loss of two carbon atoms from the opening of the ring of five carbon atoms. Similar transitions were reported by Ma et al. who determined rasagiline in human plasma (Ma et al., 2008). Diazepam binds the benzodiazepine site on the GABA<sub>A</sub> receptor via the constituent chlorine atom, and lead to central nervous system depression. It gave a full scan spectrum with a protonated molecule at  $m/z$  285  $[M+H]^+$  and the formation of two intense product ions at  $m/z$  193  $[C_9H_6ClN_2O]^+$  and at  $m/z$  154. The following transitions were used for quantification and confirmation purposes. These transitions were in accordance with the ones reported by Nödler et al. (Nödler et al., 2010) and García-Galán et al. (García-Galán et al., 2016) among others. Clomethiazole acts like a sedative, hypnotic, muscle relaxant and anticonvulsant; by analysing this compound in LC-MS/MS, it gave a full scan spectrum with a precursor ion at  $m/z$  162  $[M+H]^+$ . The corresponding product ions generated were at  $m/z$  126  $[C_6H_8NS]^+$ , formed by the loss of a chloride molecule, and at  $m/z$  112  $[C_5H_6NS]^+$ . Gómez-Canela et al. optimized the protonated molecule of clomethiazole and reported the same product ions by LC-MS/MS (Gómez-Canela et al., 2019). When scopolamine was analysed by LC-MS/MS, the highest intense ion was acquired at  $m/z$  304  $[M+H]^+$  with 27 V as C.V. Using this voltage, was reported the fragment ions at  $m/z$  156 and at  $m/z$  138  $[C_8H_{12}NO]^+$ . Similar transitions were reported by Björnstad et al., who developed a multi-component LC-MS/MS method for detection of ten plant-derived psychoactive substances in urine (Björnstad et al., 2009).

Fluoxetine is an antidepressant of the selective serotonin reuptake inhibitor (SSRI) class, and its full scan spectrum provided a protonated ion at  $m/z$  310  $[M+H]^+$ . From this molecular ion, two product ions were acquired at  $m/z$  148  $[C_{10}H_{14}N]^+$  and at  $m/z$  44  $[C_2H_6N]^+$ . Other pharmaceuticals classified as SSRIs are citalopram and escitalopram, and also used as antidepressants. Citalopram is a racemic mixture, whereas escitalopram is its S-enantiomer. Both pharmaceuticals have the same molecular weight and were protonated reporting a precursor ion at  $m/z$  325  $[M+H]^+$ , and also, two fragment ions at  $m/z$  262  $[C_{18}H_{16}NO]^+$  and at  $m/z$  109  $[C_7H_6F]^+$ . Trazodone is an antidepressant medication that produced a protonated molecule ion at  $m/z$  372  $[M+H]^+$ . Its product ions were at  $m/z$  148  $[C_7H_6N_3O]^+$  formed by the loss of a C<sub>10</sub>H<sub>12</sub>N<sub>2</sub>Cl molecule, and at  $m/z$  176  $[C_9H_{10}N_3O]^+$  corresponding to the loss of a C<sub>2</sub>H<sub>4</sub> molecule. Whereas another antidepressant medication of the serotonin-norepinephrine reuptake inhibitor class is venlafaxine, it gave full scan spectrum showing a protonated molecule at  $m/z$  278  $[M+H]^+$ . Using 47 V as C.V., two product ions were reported at  $m/z$  121  $[C_8H_8O]^+$  and at  $m/z$  58  $[C_3H_8N]^+$ . All the previous pharmaceuticals

and metabolite were simultaneously analysed in blood through LC-MS/MS, acquiring similar transitions for each one (Sempio et al., 2014).

Caffeine showed the protonated molecule at  $m/z$  195  $[M+H]^+$  in its full scan spectrum. One product ion from this precursor showed the loss of  $C_2H_3NO$  at  $m/z$  138  $[C_6H_8N_3O]^+$ , whereas the second product ion was formed at  $m/z$  110  $[C_5H_7N_3]^+$  formed by the loss of a CO. This stimulant was analysed in some studies providing similar results as the following transitions 195>138 and 195>110 (Althakafy et al., 2017)(Asimakopoulos et al., 2017). Donepezil is a medication used to improve cognition and behaviour of people with Alzheimer, analysing this drug by LC-MS/MS the compound formed the protonated molecule at  $m/z$  381  $[M+H]^+$ . Moreover, from the precursor ion followed the formation of the fragment ions at  $m/z$  243  $[C_{16}H_{21}NO]^+$  that corresponds to the loss of a  $C_8H_8O_2$  molecule and at  $m/z$  91  $[C_7H_7]^+$ . The SRM transitions 380>91 and 380>243 were chosen for quantification and confirmation purposes. Another medication used to treat Alzheimer's disease is memantine that it gave a full scan spectrum providing a protonated molecule at  $m/z$  180  $[M+H]^+$ . Using 30 V as C.V., two fragment ions were acquired at  $m/z$  163  $[C_{12}H_{19}]^+$  and at  $m/z$  107. Both pharmaceuticals were chosen to be in the multi-residue method for scrutinizing psychotropic compounds in natural water by Briudes et al. who reported the same transitions (Briudes et al., 2017).

#### *Respiratory system (R)*

Herein, the pharmaceuticals studied were dichlorobenzyl alcohol, amylmetacresol, budesonide, fluticasone propionate, tiotropium bromide, acetylcysteine, dextromethorphan, cloperastine and chlorpheniramine. Dichlorobenzyl alcohol is an antiseptic that showed a protonated molecule at  $m/z$  159  $[M-H_2O+H]^+$ , corresponding to the loss of a water molecule. From this protonated ion, the highest intense fragment ions were at  $m/z$  123  $[C_7H_5Cl]^+$  acquired at 19 eV of C.E. and at  $m/z$  89  $[C_7H_5]^+$  with 30 eV. The product ions were formed by the loss of one and two chloride molecules respectively. Otherwise, amylmetacresol is another antiseptic medication used to treat infections of the mouth and throat. It gave a protonated ion at  $m/z$  179  $[M+H]^+$ , generating two intense product ions at  $m/z$  109  $[C_8H_{13}]^+$  formed by the loss of  $C_4H_6O$  molecule, and at  $m/z$  71  $[C_5H_{11}]^+$  both with 8 eV of C.E.

Budesonide is a pharmaceutical of the corticosteroid type that gave the protonated ion at  $m/z$  431  $[M+H]^+$  at 29 V of C.V. From this precursor, two product ions were formed at  $m/z$  147  $[C_{10}H_{11}O]^+$  and at  $m/z$  73  $[C_4H_9O]^+$  both at 30 eV, these fragments were used for quantification and confirmation purposes. Fluticasone propionate was analysed by LC-MS/MS producing the protonated molecule at  $m/z$  501  $[M+H]^+$ . From this precursor ion and using 58 V as C.V., two fragment ions were produced at  $m/z$  313 with 12 eV of C.E. and at  $m/z$  293  $[C_{17}H_{19}F_2O_2]^+$  with 18 eV. These pharmaceuticals were included in the determination of 160 drugs in urine and blood of livestock and poultry by UHPLC-MS/MS carried out by Qie et al., who reported the protonated ions and product ions (Qie et al., 2019).

Tiotropium bromide full scan spectrum showed the protonated molecule at  $m/z$  393  $[M+H]^+$  corresponding to the initial loss of a water molecule and a bromine molecule as its molecular weight is  $472\text{ g}\cdot\text{mol}^{-1}$ . It formed two intense product ions at  $m/z$  170  $[C_9H_{16}NO_2]^+$  that corresponds to the loss of  $C_{10}H_7O_2S_2$  molecule and at  $m/z$  152  $[C_9H_{14}NO]^+$  formed by the loss of an oxygen moiety from the other product ion. Acetylcysteine solution is a mucolytic that showed the intense protonated molecule at  $m/z$  164  $[M+H]^+$  at 24 V. The product ion from this precursor ion were reported at  $m/z$  122  $[C_3H_2O_3]^+$  corresponding to the loss of an acetyl moiety and at  $m/z$  76  $[C_2H_5NS]^+$ , used for quantification and confirmation purposes, respectively. It also belongs to this class dextromethorphan that is a medication used as a cough medicine. It showed the protonated molecule at  $m/z$  272  $[M+H]^+$ , corresponding to the loss of a water and bromide molecule, with the formation of two intense product ions at  $m/z$  171 for confirmation purposes and the second product ion at  $m/z$  147 for quantification purposes. Ferrer et Thurman developed an analytical method of 100 pharmaceuticals and their degradates in water samples by LC/Q-TOF-MS reporting in some compounds till four fragment ions, for the dextromethorphan three product ions were acquired at  $m/z$  213, at  $m/z$  171 and at  $m/z$  147 (Ferrer and Thurman, 2012).



Otherwise, cloperastine gave a full scan spectrum with an intense protonated molecule at  $m/z$  331  $[M+H]^+$  corresponding to the loss of a chloride molecule. Using 42 V of CV, it produced the two main fragments at  $m/z$  203  $[C_{13}H_{12}Cl]^+$  which corresponds to the loss of a  $C_7H_{14}NO$  group and at  $m/z$  166  $[C_{13}H_{10}]^+$  corresponding to the loss of chloride molecule from the  $m/z$  203. Finally, another drug belonging to this group is chlorpheniramine, which is a first-generation alkylamine antihistamine. It gave a full mass spectrum with a precursor ion at  $m/z$  275  $[M+H]^+$ . MS/MS spectra of this precursor ion provided the fragment ions at  $m/z$  230  $[C_{14}H_{13}ClN]^+$  at 18 eV of C.E. and at  $m/z$  167  $[C_9H_{10}NCl]^+$  at 43 eV. In a previous study, Gómez-Canela et al. studied these pharmaceuticals by LC-MS/MS and reported the same transitions for both compounds (Gómez-Canela et al., 2019).

**Table S3.** MS/MS fragmentation of the pharmaceuticals ordered following de ATC code for the pharmaceuticals; and including their metabolites, transformation product and internal standard (\*).

| Acetylsalicylic acid                                                                | Salicylic acid *                                                                   | Aspirin-d <sub>3</sub>                                                              |
|-------------------------------------------------------------------------------------|------------------------------------------------------------------------------------|-------------------------------------------------------------------------------------|
| 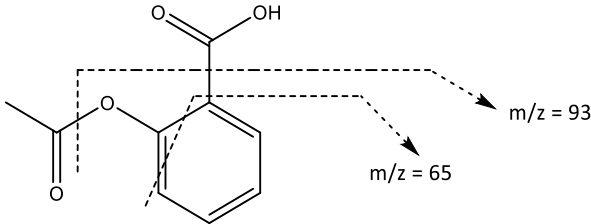   |  |  |
| Ranitidine                                                                          | Omeprazole                                                                         | Pantoprazole                                                                        |
|    |  |  |
| Esomeprazole                                                                        |                                                                                    |                                                                                     |
|  |                                                                                    |                                                                                     |
| Vildagliptin                                                                        |                                                                                    | Amiodarone                                                                          |

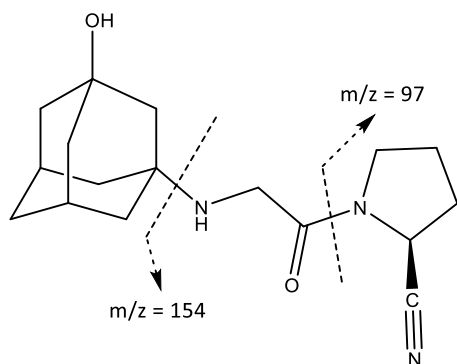

Hydrochlorothiazide

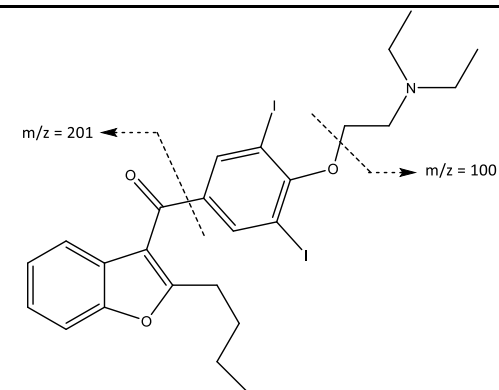

Pentoxifylline

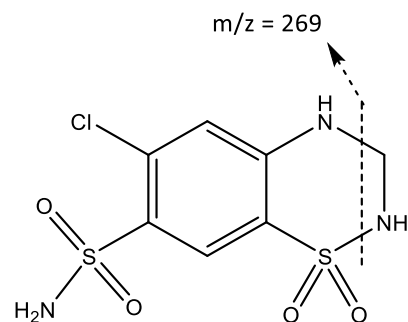

Lidocaine

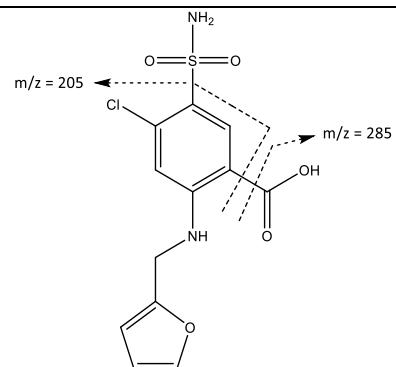

Lidocaine- $d_{10}$

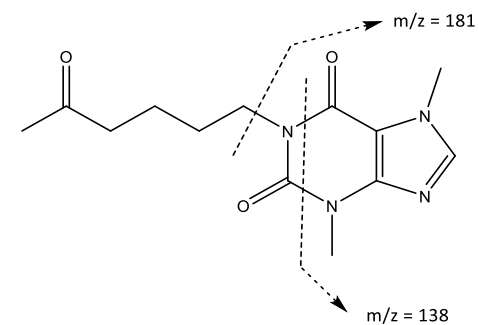

Propranolol

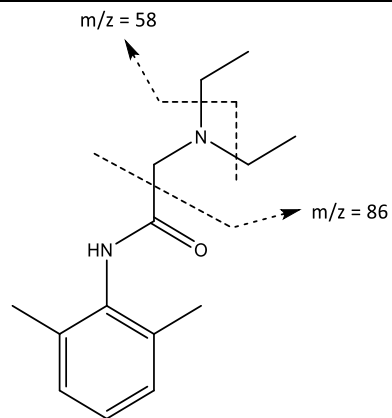

Propranolol-d<sub>7</sub>

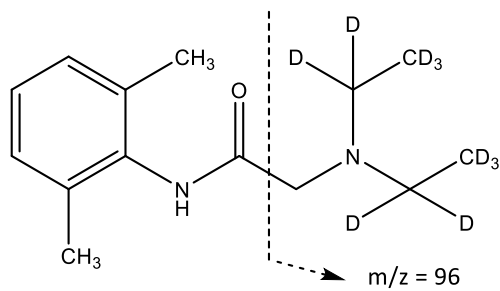

Atenolol

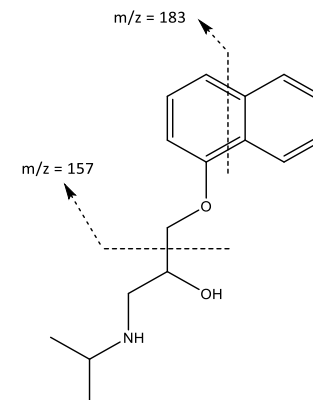

Atenolol-d<sub>7</sub>

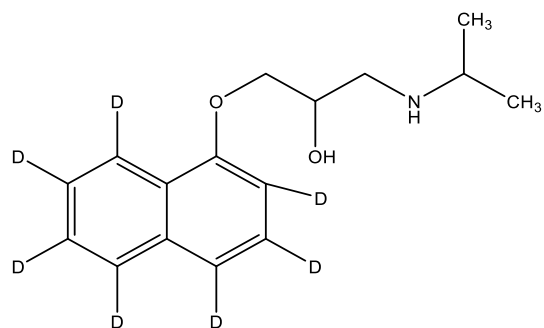

Verapamil

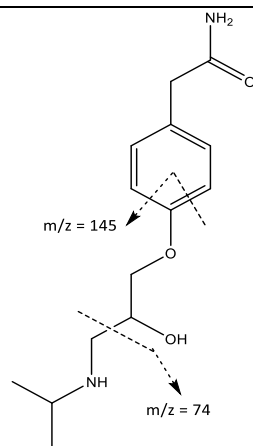

Enalapril

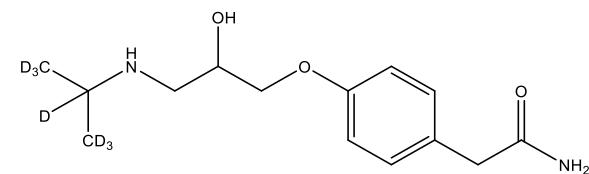

Enalaprilat \*

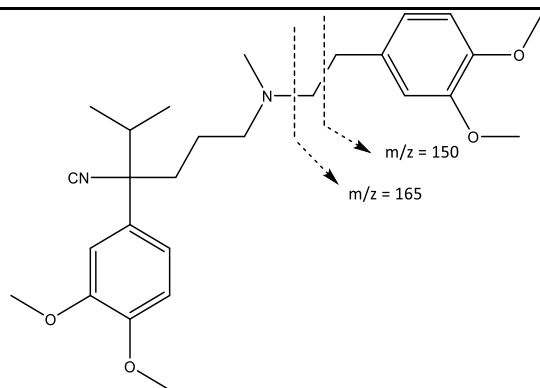

Losartan

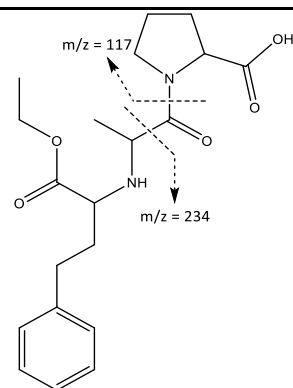

Valsartan

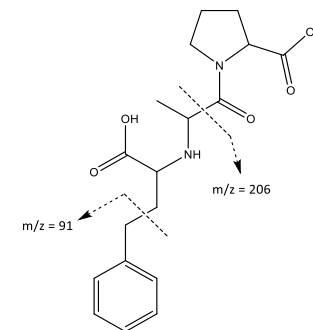

Simvastatin

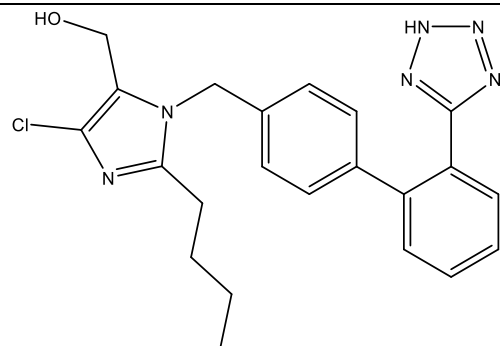

Rosuvastatin

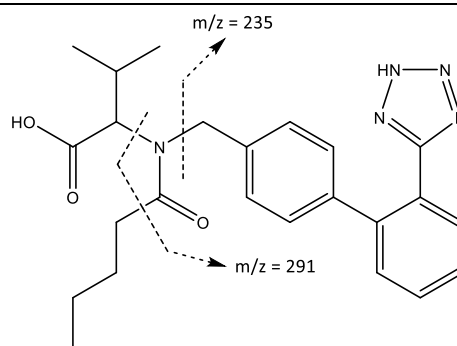

Ezetimibe

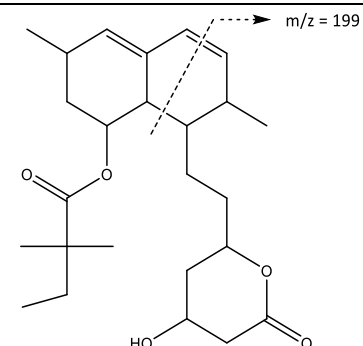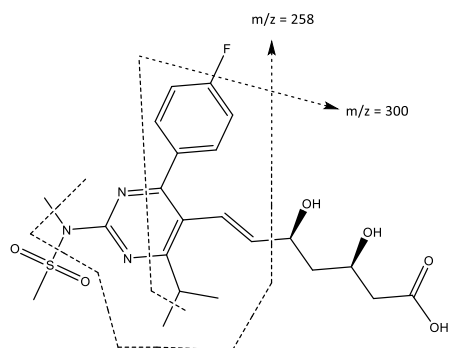

Estrone

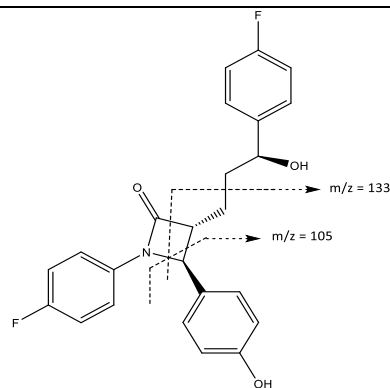

Cyproterone

Dutasteride

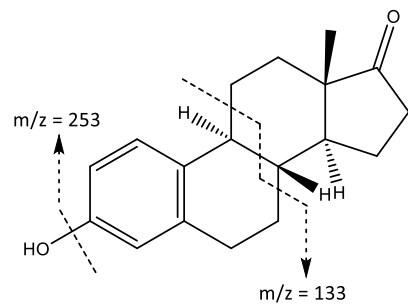

Prednisone

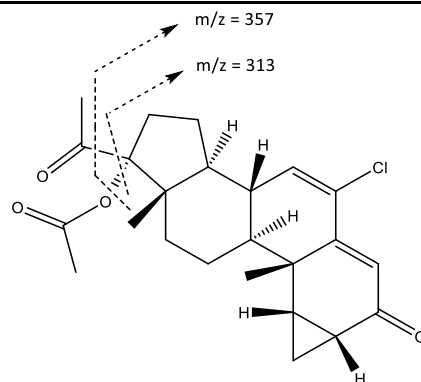

Amoxicillin

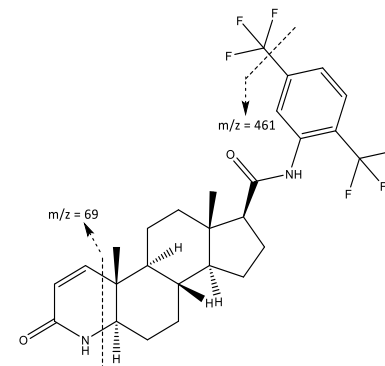

Sulfapyridine

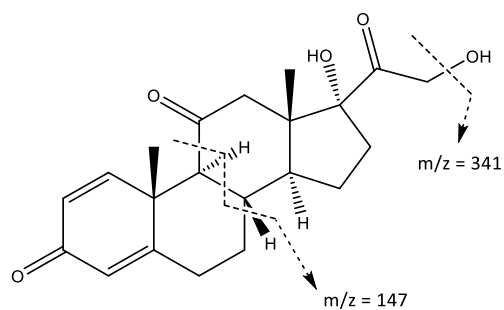

Sulfamethoxazole

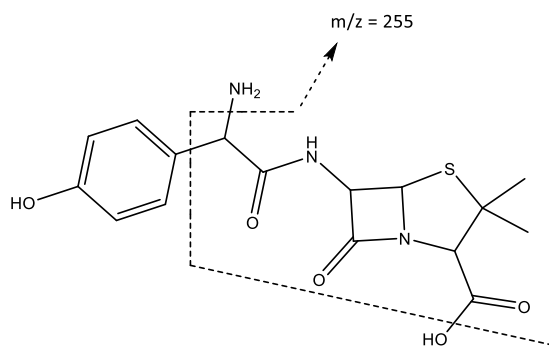

N<sup>4</sup>-acetylsulfamethoxazole \*

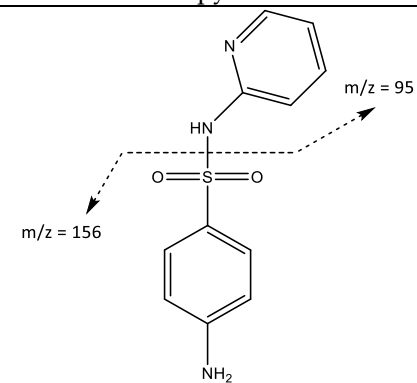

Sulfadiazine

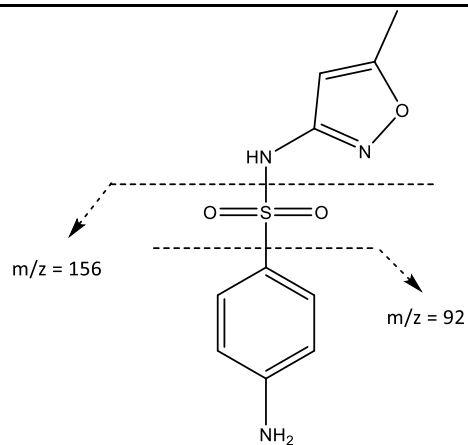

Erythromycin

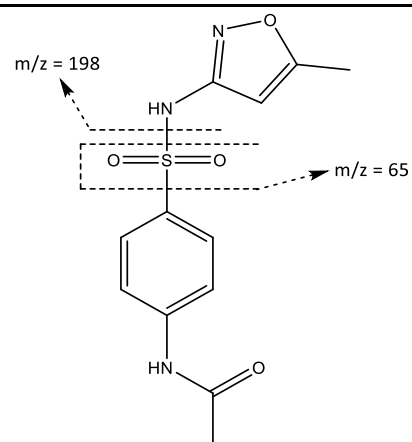

Clarithromycin

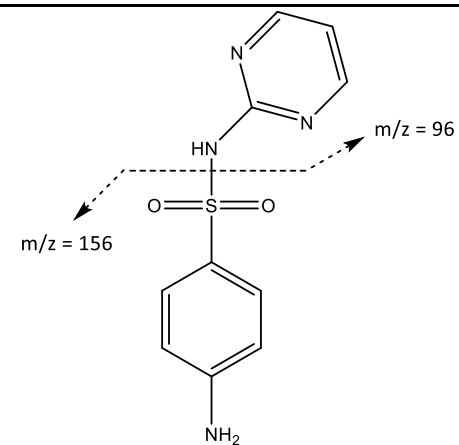

Ciprofloxacin

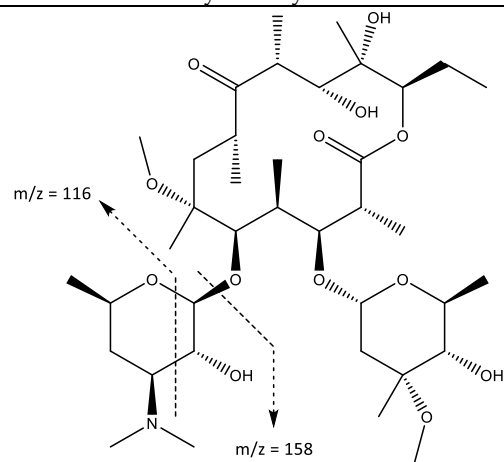

Norfloxacin

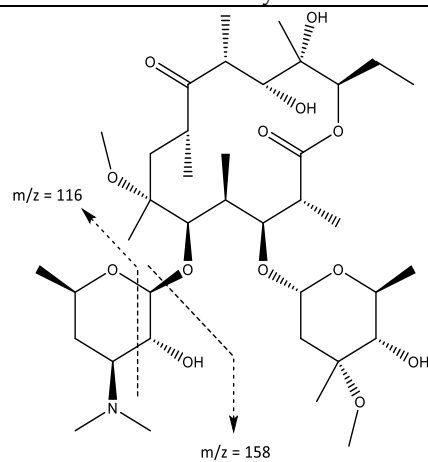

Levofloxacin

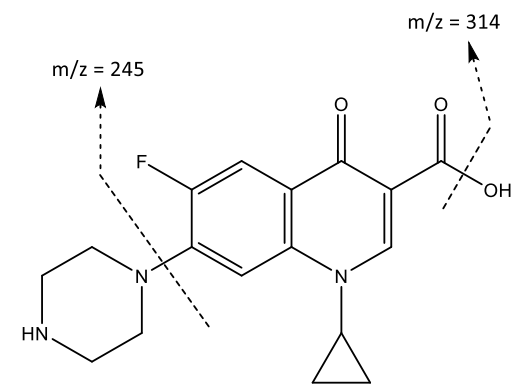

Cyclophosphamide

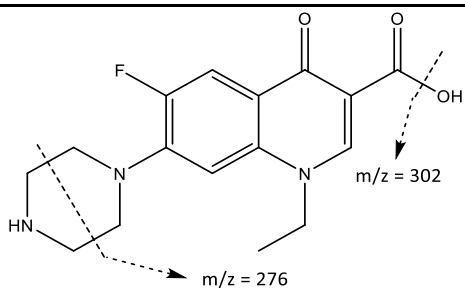

Ifosfamide

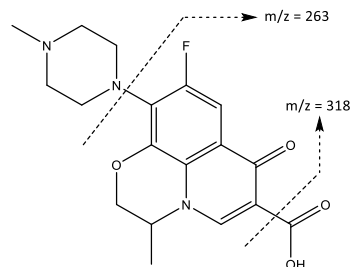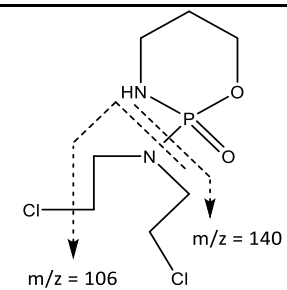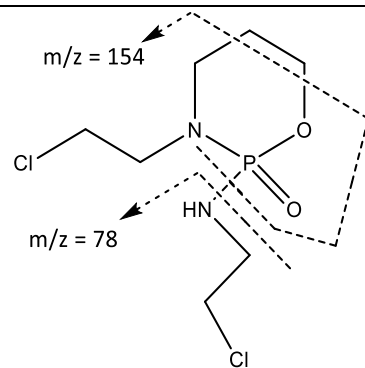

Megestrol

Bicalutamide

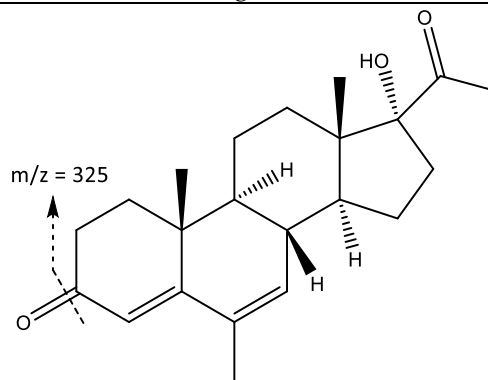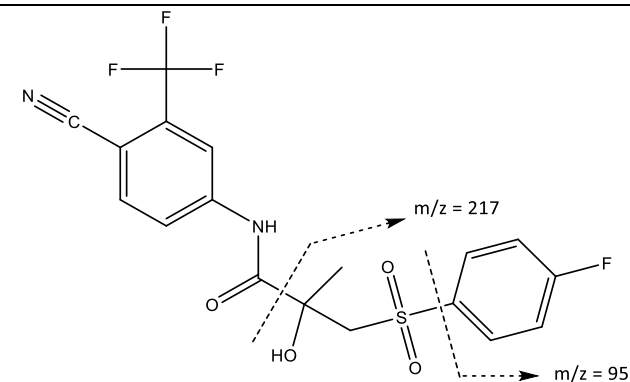

Mycophenolic acid

Diclofenac

N-(2,6-dichlorophenyl)-2-indolinone \*



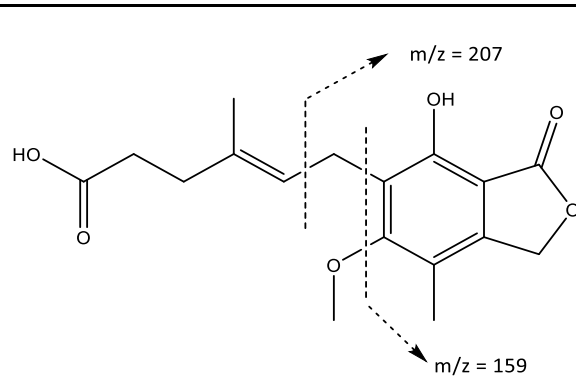

Ibuprofen

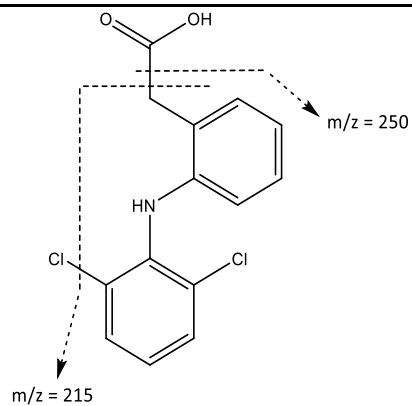

1-hydroxy ibuprofen \*

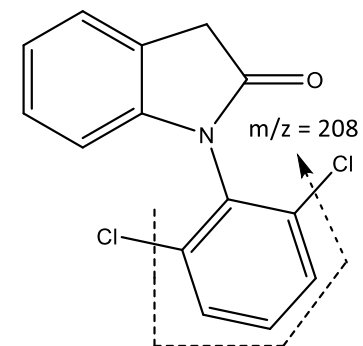

2-hydroxy ibuprofen \*

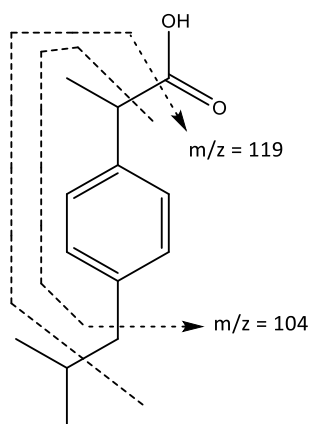

Ibuprofen- $d_3$

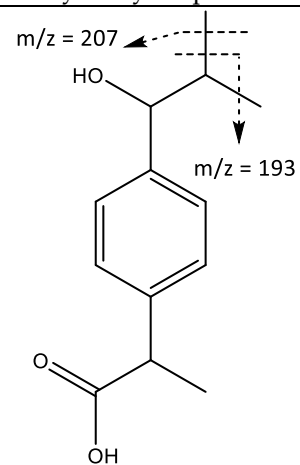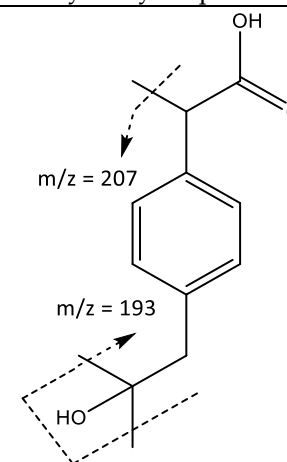

Tramadol

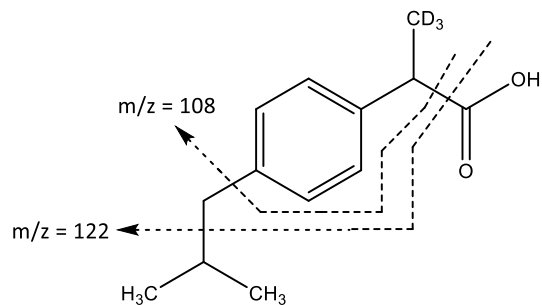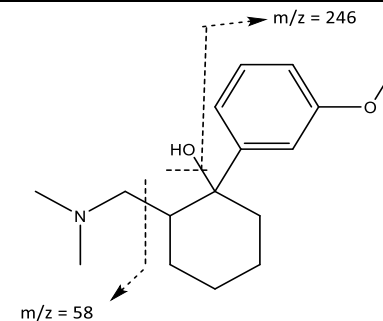

4-aminoantipyrine \*

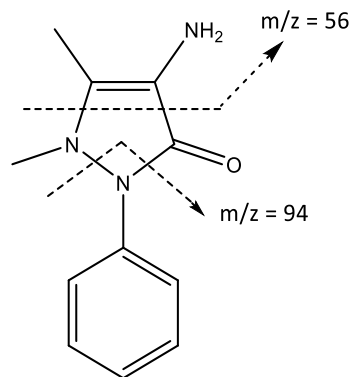

Paracetamol

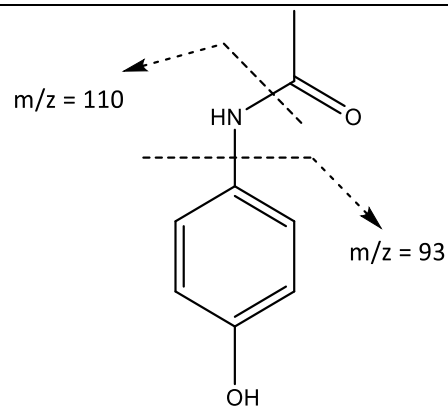

Acetaminophen-(methyl- $\text{d}_3$ )

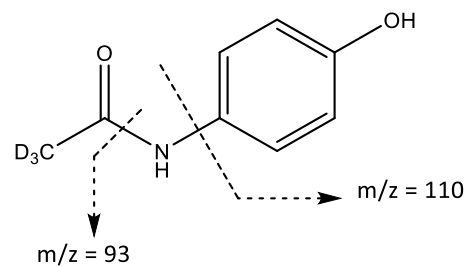

Carbamazepine

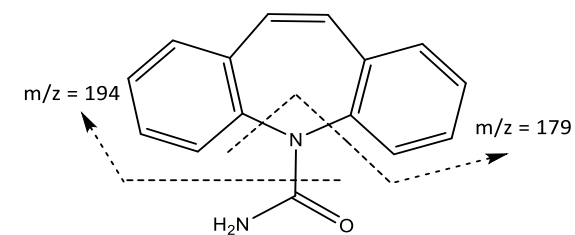

Carbamazepine 10,11-epoxide \*

Carbamazepine- $^{13}\text{C}_6$

Topiramate

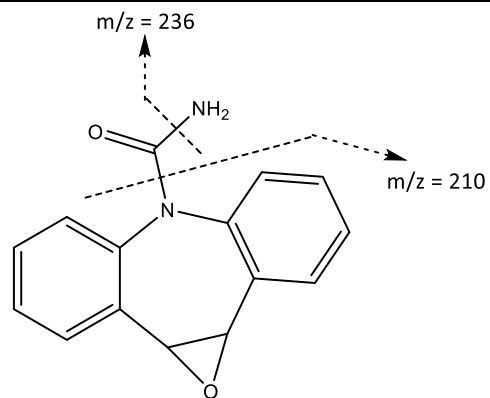

Gabapentin

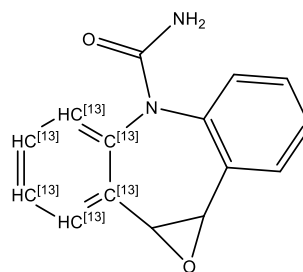

Gabapentin- $^{13}\text{C}_3$

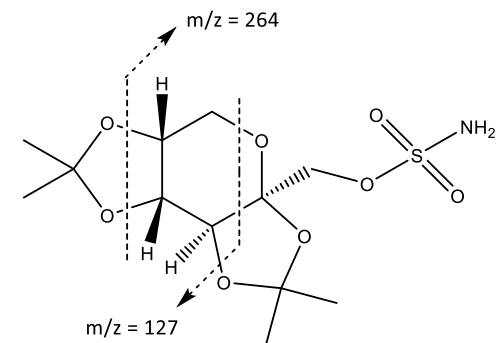

Levetiracetam

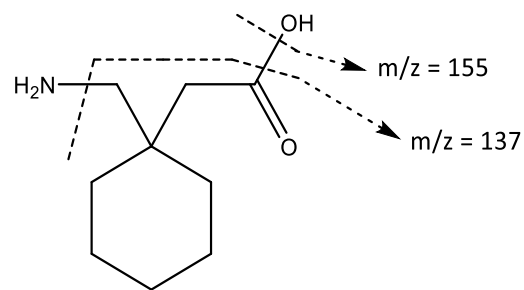

Pregabalin

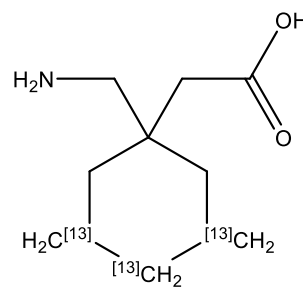

Levodopa

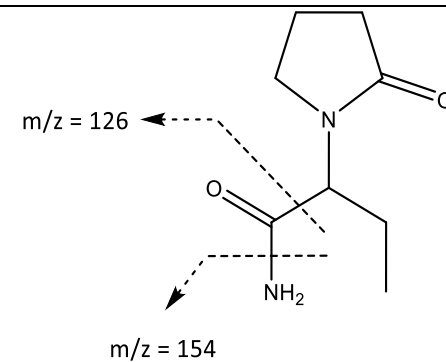

Levodopa- $\text{d}_3$

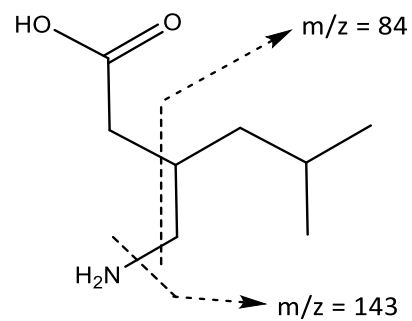

Rasagiline

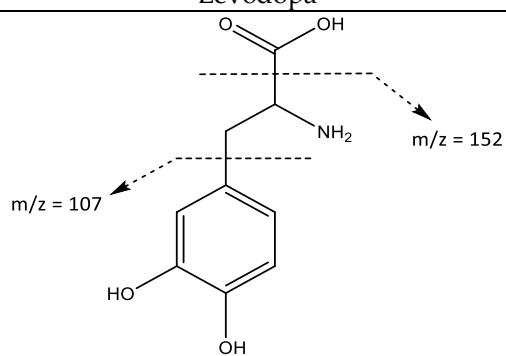

Diazepam

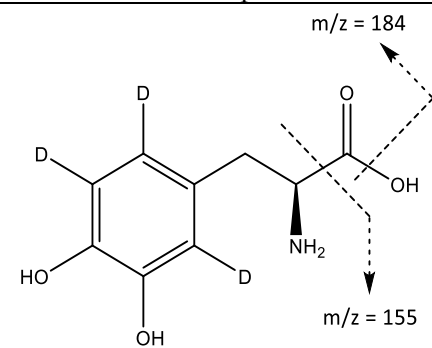

Clomethiazole

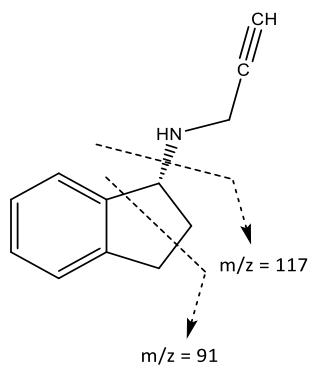

Scopolamine

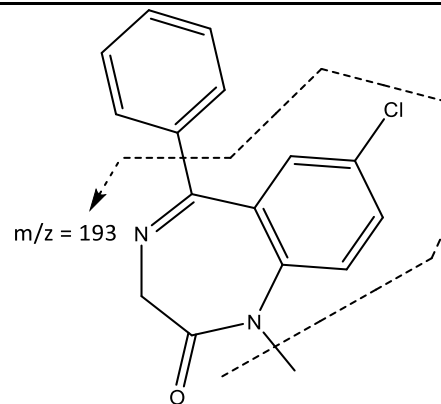

Fluoxetine

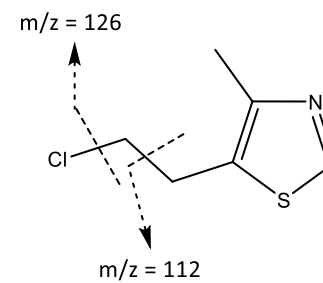

Citalopram

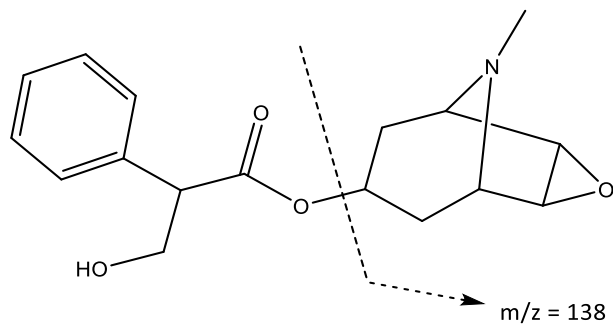

Escitalopram

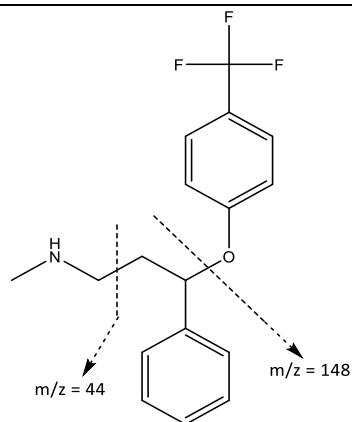

Trazodone

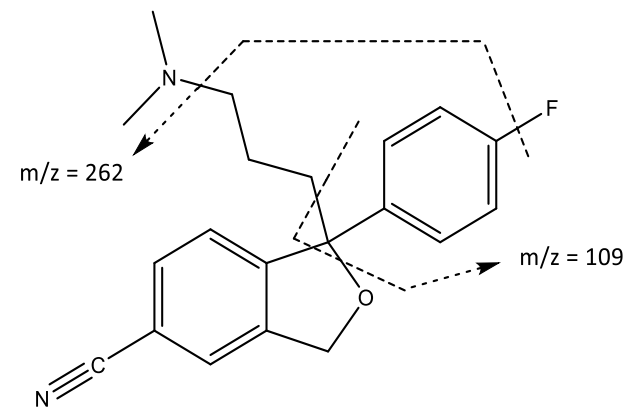

Venlafaxine

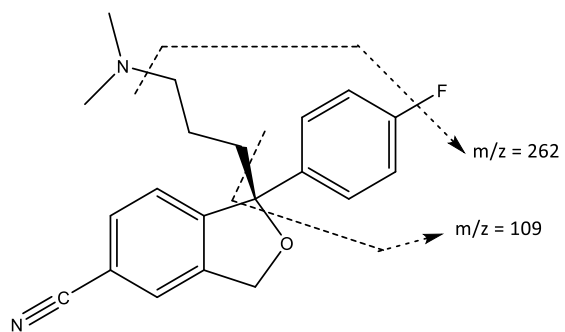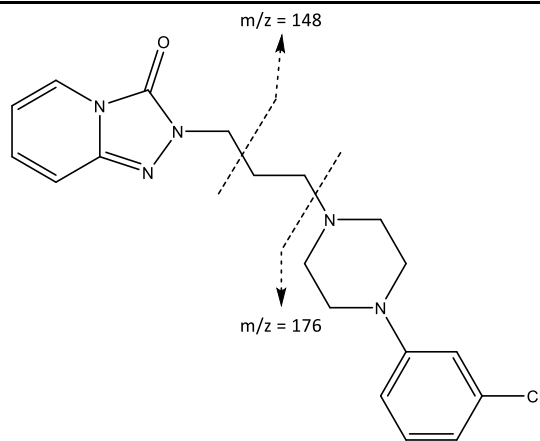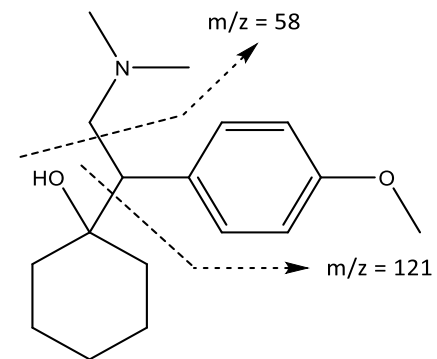

Caffeine

Donepezil

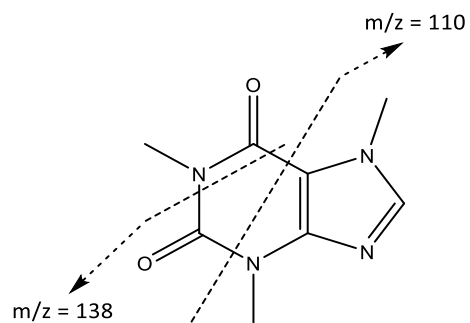

Memantine

Dichlorobenzyl alcohol

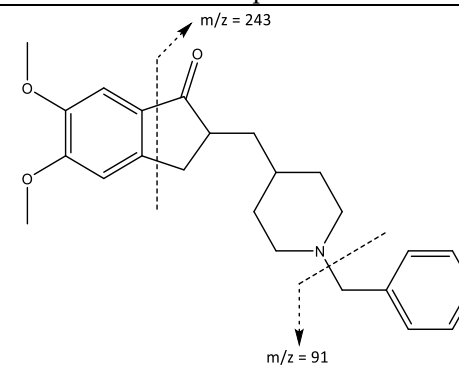

Amylmetacresol

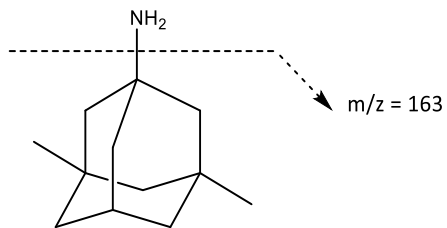

Budesonide

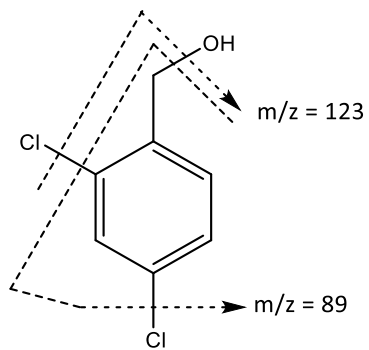

Fluticasone

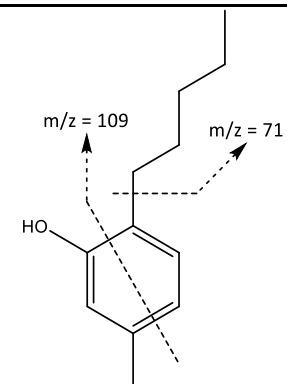

Tiotropium bromide

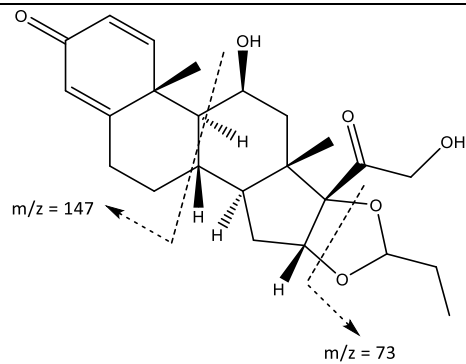

Acetylcysteine

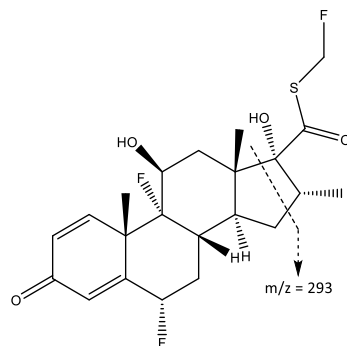

Dextromethorphan

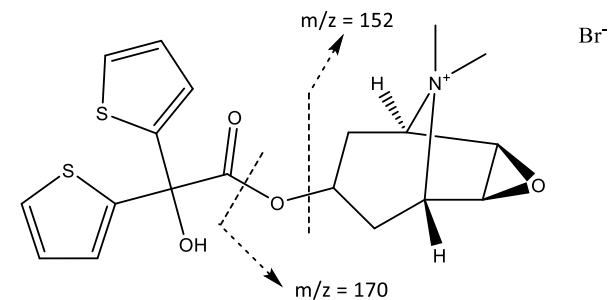

Cloperastine

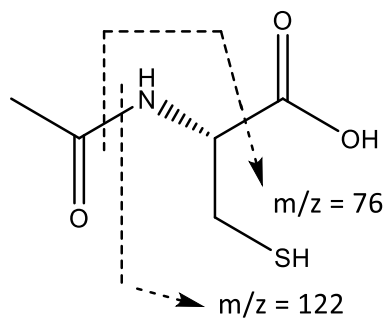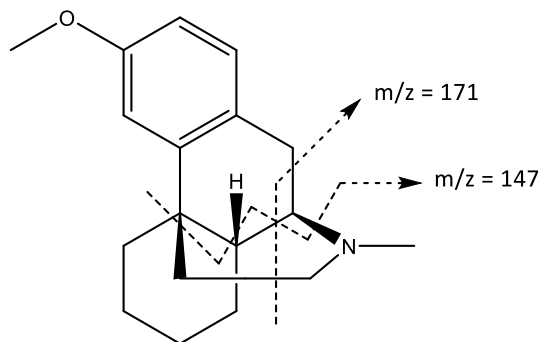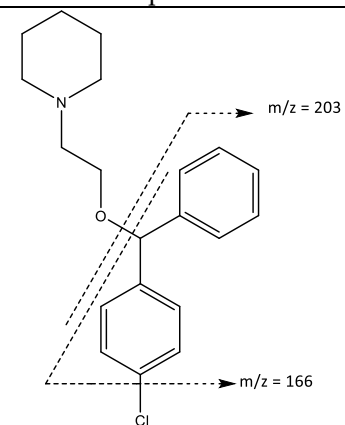

---

# Chlorpheniramine

---

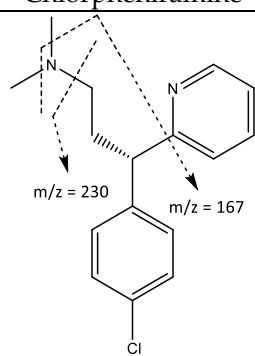

## References

1. Al-ghobashy, M.A., Kamal, S.M., El-sayed, G.M., Attia, A.K., Nagy, M., Elzeiny, A., Elrakaiby, M.T., Nooh, M.M., Abbassi, M., Aziz, R.K., 2018. Determination of voriconazole and co-administered drugs in plasma of pediatric cancer patients using UPLC-MS/MS: A key step towards personalized therapeutics. *J. Chromatogr. B* 1092, 489–498. <https://doi.org/10.1016/j.jchromb.2018.06.043>
2. Althakafy, J.T., Kulsing, C., Grace, M.R., Marriott, P.J., 2017. Liquid chromatography – quadrupole Orbitrap mass spectrometry method for selected pharmaceuticals in water samples. *J. Chromatogr. A* 1515, 164–171. <https://doi.org/10.1016/j.chroma.2017.08.003>
3. Asimakopoulou, A.G., Kannan, P., Higgins, S., Kannan, K., 2017. Determination of 89 drugs and other micropollutants in unfiltered wastewater and freshwater by LC-MS/MS: an alternative sample preparation approach. *Anal. Bioanal. Chem.* 409, 6205–6225. <https://doi.org/10.1007/s00216-017-0561-x>
4. Ayoub, B.M., Mowaka, S., 2017. LC-MS/MS Determination of Empagliflozin and Metformin. *J. Chromatogr. Sci.* 55, 742–747. <https://doi.org/10.1093/chromsci/bmx030>
5. Babić, S., Pavlovic, D.M., Asperger, D., Perisa, M., Zrneić, M., Horvat, A.J.M., Kastelan-Macan, M., 2010. Determination of multi-class pharmaceuticals in wastewater by liquid chromatography – tandem mass spectrometry (LC-MS-MS). *Anal. Bioanal. Chem.* 1185–1194. <https://doi.org/10.1007/s00216-010-4004-1>
6. Baena-Nogueras, R.M., Pintado-Herrera, M.G., González-Mazo, E., Lara-Martín, P.A., 2016. Determination of Pharmaceuticals in Coastal Systems using Solid Phase Extraction (SPE) followed by Ultra Performance Liquid Chromatography – tandem Mass Spectrometry (UPLC-MS/MS). *Curr. Anal. Chem.* 12, 183–201.
7. Björnstad, K., Beck, O., Helander, A., 2009. A multi-component LC-MS/MS method for detection of ten plant-derived psychoactive substances in urine. *J. Chromatogr. B Anal. Technol. Biomed. Life Sci.* 877, 1162–1168. <https://doi.org/10.1016/j.jchromb.2009.03.004>
8. Briudes, V., Lardy-Fontan, S., Vaslin-Reimann, S., Budzinski, H., Lalere, B., 2017. Development of a multi-residue method for scrutinizing psychotropic compounds in natural waters. *J. Chromatogr. B Anal. Technol. Biomed. Life Sci.* 1047, 160–172. <https://doi.org/10.1016/j.jchromb.2016.07.016>
9. Ferrer, I., Thurman, E.M., 2012. Analysis of 100 pharmaceuticals and their degradates in water samples by liquid chromatography/quadrupole time-of-flight mass spectrometry. *J. Chromatogr. A* 1259, 148–157. <https://doi.org/10.1016/j.chroma.2012.03.059>
10. García-Galán, M.J., Petrovic, M., Rodríguez-Mozaz, S., Barceló, D., 2016. Multiresidue trace analysis of pharmaceuticals, their human metabolites and transformation products by fully automated on-line solid-phase extraction-liquid chromatography-tandem mass spectrometry. *Talanta* 158, 330–341. <https://doi.org/10.1016/j.talanta.2016.05.061>
11. Gómez-Canela, C., Sala-Comorera, T., Pueyo, V., Barata, C., Lacorte, S., 2019. Analysis of 44 pharmaceuticals consumed by elderly using liquid chromatography coupled to tandem mass spectrometry. *J. Pharm. Biomed. Anal.* 168, 55–63. <https://doi.org/10.1016/j.jpba.2019.02.016>
12. Gurke, R., Rossmann, J., Schubert, S., Sandmann, T., Rößler, M., Oertel, R., Fauler, J., 2015. Development of a SPE-HPLC-MS/MS method for the determination of most prescribed pharmaceuticals and related metabolites in urban sewage samples. *J. Chromatogr. B* 990, 23–30. <https://doi.org/10.1016/j.jchromb.2015.03.008>
13. Hijosa-Valsero, M., Reyes-Contreras, C., Domínguez, C., Bécares, E., Bayona, J.M., 2016. Behaviour of pharmaceuticals and personal care products in constructed wetland compartments: Influent, effluent, pore water, substrate and plant roots. *Chemosphere* 145, 508–517. <https://doi.org/10.1016/j.chemosphere.2015.11.090>
14. Jiang, J., Lee, C., Fang, M., 2014. Emerging organic contaminants in coastal waters: Anthropogenic impact, environmental release and ecological risk. *Mar. Pollut. Bull.* 85, 391–399. <https://doi.org/10.1016/j.marpolbul.2013.12.045>
15. Kafeenah, H.I.S., Osman, R., Bakar, N.K.A., 2018. Disk solid-phase extraction of multi-class pharmaceutical residues in tap water and hospital wastewater, prior to ultra-performance liquid chromatographic-tandem mass spectrometry (UPLC-MS/MS) analyses. *R. Soc. Chem.* 8, 40358–40368. <https://doi.org/10.1039/c8ra06885b>
16. Larabie, S.P., Houde, M., Gagnon, C., 2017. Determination of the bioavailability of selected pharmaceutical residues in fish plasma using liquid chromatography coupled to tandem mass spectrometry. *J. Chromatogr. A* 1522, 48–55. <https://doi.org/10.1016/j.chroma.2017.09.055>
17. López-Serna, R., Petrović, M., Barceló, D., 2012. Direct analysis of pharmaceuticals, their metabolites and transformation products in environmental waters using on-line TurboFlow™ chromatography-liquid chromatography-tandem mass spectrometry. *J. Chromatogr. A* 1252, 115–129. <https://doi.org/10.1016/j.chroma.2012.06.078>
18. Ma, J., Chen, X., Duan, X., Deng, P., Wang, H., Zhong, D., 2008. Validated LC-MS/MS method for quantitative determination of rasagiline in human plasma and its application to a pharmacokinetic study. *J. Chromatogr. B* 873, 203–208. <https://doi.org/https://doi.org/10.1016/j.jchromb.2008.08.024>
19. Martín, J., Buchberger, W., Luis, J., Alonso, E., Aparicio, I., 2012. High-performance liquid chromatography quadrupole time-of-flight mass spectrometry method for the analysis of antidiabetic drugs in aqueous environmental samples. *J. Chromatogr. B* 895–896, 94–101. <https://doi.org/10.1016/j.jchromb.2012.03.023>
20. Nödler, K., Licha, T., Bester, K., Sauter, M., 2010. Development of a multi-residue analytical method, based on liquid chromatography – tandem mass spectrometry, for the simultaneous determination of 46 micro-



- contaminants in aqueous samples. *J. Chromatogr. A* 1217, 6511–6521. <https://doi.org/10.1016/j.chroma.2010.08.048>
21. Oertel, R., Baldauf, J., Rossmann, J., 2018. Development and validation of a hydrophilic interaction liquid chromatography-tandem mass spectrometry method for the quantification of the antidiabetic drug metformin and six others pharmaceuticals in wastewater. *J. Chromatogr. A* 1556, 73–80. <https://doi.org/10.1016/j.chroma.2018.04.068>
  22. Paiga, P., Santos, L.H.M.L.M., Delerue-Matos, C., 2017. Development of a multi-residue method for the determination of human and veterinary pharmaceuticals and some of their metabolites in aqueous environmental matrices by SPE-UHPLC – MS/MS. *J. Pharm. Biomed. Anal.* 135, 75–86. <https://doi.org/10.1016/j.jpba.2016.12.013>
  23. Pedrouzo, M., Borrull, F., Marcé, R.M., Pocurull, E., 2008. Simultaneous determination of macrolides, sulfonamides, and other pharmaceuticals in water samples by solid-phase extraction and LC- (ESI) MS. *J. Sep. Sci.* 31, 2182–2188. <https://doi.org/10.1002/jssc.200700571>
  24. Pontarolo, R., Gimenez, A.C., Martins, T., Francisco, G. De, Ribeiro, R.P., Lada, F., Pontes, D., Gasparetto, J.C., 2014. Simultaneous determination of metformin and vildagliptin in human plasma by a HILIC–MS/MS method. *J. Chromatogr. B* 965, 133–141. <https://doi.org/10.1016/j.jchromb.2014.06.023>
  25. Qie, M., Zhao, Y., Yang, S., Wang, W., Xu, Z., 2019. Rapid simultaneous determination of 160 drugs in urine and blood of livestock and poultry by ultra-high-performance liquid chromatography-tandem mass spectrometry. *J. Chromatogr. A* 1608, 460423. <https://doi.org/10.1016/j.chroma.2019.460423>
  26. Sempio, C., Morini, L., Vignali, C., Groppi, A., 2014. Simple and sensitive screening and quantitative determination of 88 psychoactive drugs and their metabolites in blood through LC-MS/MS: Application on postmortem samples. *J. Chromatogr. B Anal. Technol. Biomed. Life Sci.* 970, 1–7. <https://doi.org/10.1016/j.jchromb.2014.08.039>
  27. Tisler, S., Zwiener, C., 2018. Formation and occurrence of transformation products of metformin in wastewater and surface water. *Sci. Total Environ.* 628–629, 1121–1129. <https://doi.org/10.1016/j.scitotenv.2018.02.105>
  28. Vilhena, R. de O., Pontes, F.L.D., Marson, B.M., Ribeiro, Rô.P., Carvalho, K.A.T. de, Cardoso, M.A., Pontarolo, R., 2014. A new HILIC-MS/MS method for the simultaneous analysis of carbidopa, levodopa, and its metabolites in human plasma. *J. Chromatogr. B Anal. Technol. Biomed. Life Sci.* 967, 41–49. <https://doi.org/10.1016/j.jchromb.2014.06.030>
